# Supplementary material
Source: publisher site journal article supplement (https://www.dovepress.com/article/566459)
Supplement: Supplementary file 1 [file Supplementary%20Material.pdf]

**Supplementary Table 1.** 1044 genes that were significantly positively co-expressed with SLC25A3 in HCC

| id                 | gene_name | correlation_spearman | pvalue_spearman | padj_spearman |
|--------------------|-----------|----------------------|-----------------|---------------|
| ENSG00000110955.9  | ATP5F1B   | 0.701114192          | 0               | 0             |
| ENSG00000136045.12 | PWP1      | 0.650064028          | 0               | 0             |
| ENSG00000175203.17 | DCTN2     | 0.645100543          | 0               | 0             |
| ENSG00000184752.13 | NDUFA12   | 0.644165102          | 0               | 0             |
| ENSG00000132341.12 | RAN       | 0.64101286           | 0               | 0             |
| ENSG00000181929.13 | PRKAG1    | 0.597682729          | 0               | 0             |
| ENSG00000108010.12 | GLRX3     | 0.591840724          | 1.02256E-36     | 7.33132E-35   |
| ENSG00000166226.13 | CCT2      | 0.590972918          | 0               | 0             |
| ENSG00000173660.12 | UQCRH     | 0.587948216          | 0               | 0             |
| ENSG00000154518.10 | ATP5MC3   | 0.587245832          | 0               | 0             |
| ENSG00000132305.21 | IMMT      | 0.585518086          | 0               | 0             |
| ENSG00000165637.13 | VDAC2     | 0.583683364          | 1.58167E-35     | 1.13254E-33   |
| ENSG00000111786.9  | SRSF9     | 0.583648349          | 0               | 0             |
| ENSG00000089053.13 | ANAPC5    | 0.579479463          | 0               | 0             |
| ENSG00000115484.15 | CCT4      | 0.578024             | 0               | 0             |
| ENSG00000169021.6  | UQCRRS1   | 0.574870841          | 0               | 0             |
| ENSG00000125977.7  | EIF2S2    | 0.574674256          | 0               | 0             |
| ENSG00000146731.11 | CCT6A     | 0.574080142          | 0               | 0             |
| ENSG00000089154.11 | GCN1      | 0.573638801          | 0               | 0             |
| ENSG00000139726.11 | DENR      | 0.572623532          | 0               | 0             |
| ENSG00000165629.20 | ATP5F1C   | 0.571972072          | 0               | 0             |
| ENSG00000111142.14 | METAP2    | 0.570618457          | 0               | 0             |
| ENSG00000111737.12 | RAB35     | 0.567125346          | 0               | 0             |
| ENSG00000110958.16 | PTGES3    | 0.56537902           | 0               | 0             |
| ENSG00000101365.21 | IDH3B     | 0.563960717          | 0               | 0             |
| ENSG00000065978.19 | YBX1      | 0.562714914          | 0               | 0             |
| ENSG00000111237.19 | VPS29     | 0.561708592          | 0               | 0             |
| ENSG00000139233.7  | LLPH      | 0.56169065           | 1.75503E-32     | 1.25508E-30   |
| ENSG00000182180.14 | MRPS16    | 0.560407736          | 0               | 0             |

|                    |          |             |             |             |
|--------------------|----------|-------------|-------------|-------------|
| ENSG00000111669.15 | TPI1     | 0.5562049   | 0           | 0           |
| ENSG00000106153.13 | CHCHD2   | 0.555183668 | 0           | 0           |
| ENSG00000178741.12 | COX5A    | 0.554192943 | 0           | 0           |
| ENSG00000131508.16 | UBE2D2   | 0.552153919 | 0           | 0           |
| ENSG00000089234.16 | BRAP     | 0.551810067 | 0           | 0           |
| ENSG00000111144.10 | LTA4H    | 0.551018368 | 4.38382E-31 | 3.13104E-29 |
| ENSG00000186298.12 | PPP1CC   | 0.550951011 | 0           | 0           |
| ENSG00000163541.12 | SUCLG1   | 0.550572522 | 0           | 0           |
| ENSG00000115241.11 | PPM1G    | 0.548651403 | 0           | 0           |
| ENSG00000137692.12 | DCUN1D5  | 0.548364878 | 9.5851E-31  | 6.83725E-29 |
| ENSG00000204954.10 | C12orf73 | 0.547924245 | 0           | 0           |
| ENSG00000135624.16 | CCT7     | 0.547503778 | 0           | 0           |
| ENSG00000118705.17 | RPN2     | 0.546324497 | 0           | 0           |
| ENSG00000005022.6  | SLC25A5  | 0.545243624 | 0           | 0           |
| ENSG00000136521.13 | NDUFB5   | 0.542056202 | 5.98809E-30 | 4.26602E-28 |
| ENSG00000163528.13 | CHCHD4   | 0.541695001 | 0           | 0           |
| ENSG00000089248.7  | ERP29    | 0.540658858 | 0           | 0           |
| ENSG00000111481.10 | COPZ1    | 0.540521914 | 0           | 0           |
| ENSG00000172113.9  | NME6     | 0.540141964 | 1.03614E-29 | 7.37229E-28 |
| ENSG00000187778.14 | MCRS1    | 0.539570415 | 0           | 0           |
| ENSG00000150753.12 | CCT5     | 0.539185961 | 0           | 0           |
| ENSG00000166986.15 | MARS1    | 0.538244556 | 0           | 0           |
| ENSG00000106554.13 | CHCHD3   | 0.537754125 | 0           | 0           |
| ENSG00000123064.13 | DDX54    | 0.537047612 | 0           | 0           |
| ENSG00000197548.12 | ATG7     | 0.535268232 | 4.11976E-29 | 2.92758E-27 |
| ENSG00000152234.16 | ATP5F1A  | 0.535204026 | 0           | 0           |
| ENSG00000167085.13 | PHB      | 0.534851457 | 0           | 0           |
| ENSG00000177646.19 | ACAD9    | 0.532851199 | 0           | 0           |
| ENSG00000122873.12 | CISD1    | 0.532257774 | 0           | 0           |
| ENSG00000196510.12 | ANAPC7   | 0.53201041  | 1.0237E-28  | 7.26545E-27 |
| ENSG00000170633.16 | RNF34    | 0.531444053 | 1.19801E-28 | 8.49181E-27 |
| ENSG00000081760.17 | AACS     | 0.530632136 | 1.50012E-28 | 1.06199E-26 |

|                    |          |             |             |             |
|--------------------|----------|-------------|-------------|-------------|
| ENSG00000013503.10 | POLR3B   | 0.528983269 | 0           | 0           |
| ENSG00000179958.10 | DCTPP1   | 0.528562573 | 0           | 0           |
| ENSG00000113845.10 | TIMMDC1  | 0.528504308 | 0           | 0           |
| ENSG00000107937.19 | GTPBP4   | 0.527737466 | 0           | 0           |
| ENSG00000005194.15 | CIAPIN1  | 0.525812218 | 0           | 0           |
| ENSG00000075188.9  | NUP37    | 0.525709452 | 0           | 0           |
| ENSG00000119013.9  | NDUFB3   | 0.525706011 | 0           | 0           |
| ENSG00000101152.11 | DNAJC5   | 0.525344497 | 0           | 0           |
| ENSG00000196262.15 | PPIA     | 0.525001792 | 0           | 0           |
| ENSG00000198015.14 | MRPL42   | 0.524030107 | 0           | 0           |
| ENSG00000113643.9  | RARS1    | 0.52250881  | 0           | 0           |
| ENSG00000144029.12 | MRPS5    | 0.521994753 | 0           | 0           |
| ENSG00000135446.17 | CDK4     | 0.521957821 | 0           | 0           |
| ENSG00000120805.14 | ARL1     | 0.52006377  | 0           | 0           |
| ENSG00000139546.11 | TARBP2   | 0.518881278 | 0           | 0           |
| ENSG00000172053.18 | QARS1    | 0.518808791 | 0           | 0           |
| ENSG00000150990.8  | DHX37    | 0.518578486 | 0           | 0           |
| ENSG00000166788.10 | SAAL1    | 0.517556336 | 0           | 0           |
| ENSG00000144635.9  | DYNC1L1  | 0.516817509 | 6.28334E-27 | 4.44262E-25 |
| ENSG00000175166.17 | PSMD2    | 0.516734212 | 0           | 0           |
| ENSG00000030110.13 | BAK1     | 0.515738212 | 0           | 0           |
| ENSG00000089157.16 | RPLP0    | 0.515713667 | 0           | 0           |
| ENSG00000177889.10 | UBE2N    | 0.515520064 | 0           | 0           |
| ENSG00000132313.15 | MRPL35   | 0.515465929 | 0           | 0           |
| ENSG00000157895.11 | C12orf43 | 0.515119813 | 9.82775E-27 | 6.93997E-25 |
| ENSG00000111361.13 | EIF2B1   | 0.515032845 | 0           | 0           |
| ENSG00000198522.14 | GPN1     | 0.514368913 | 1.19682E-26 | 8.44091E-25 |
| ENSG00000213585.11 | VDAC1    | 0.514257745 | 0           | 0           |
| ENSG00000213593.10 | TMX2     | 0.514153374 | 0           | 0           |
| ENSG00000114850.7  | SSR3     | 0.514002667 | 0           | 0           |
| ENSG00000022840.16 | RNF10    | 0.513101174 | 0           | 0           |
| ENSG00000176407.18 | KCMF1    | 0.51306516  | 0           | 0           |

|                    |           |             |             |             |
|--------------------|-----------|-------------|-------------|-------------|
| ENSG00000116459.11 | ATP5PB    | 0.512536193 | 0           | 0           |
| ENSG00000139579.13 | NABP2     | 0.512000344 | 0           | 0           |
| ENSG00000099783.12 | HNRNPM    | 0.511821881 | 0           | 0           |
| ENSG00000142230.13 | SAE1      | 0.511361988 | 2.62178E-26 | 1.84676E-24 |
| ENSG00000257218.6  | GATC      | 0.510699947 | 0           | 0           |
| ENSG00000089022.14 | MAPKAPK5  | 0.510617655 | 3.17965E-26 | 2.23692E-24 |
| ENSG00000006451.8  | RALA      | 0.510386145 | 0           | 0           |
| ENSG00000035141.8  | FAM136A   | 0.50932087  | 0           | 0           |
| ENSG00000221838.10 | AP4M1     | 0.50923075  | 4.54927E-26 | 3.19647E-24 |
| ENSG00000108883.13 | EFTUD2    | 0.509219481 | 0           | 0           |
| ENSG00000140395.9  | WDR61     | 0.509121762 | 0           | 0           |
| ENSG00000111640.15 | GAPDH     | 0.508734326 | 0           | 0           |
| ENSG00000106105.15 | GARS1     | 0.508709323 | 0           | 0           |
| ENSG00000243147.8  | MRPL33    | 0.508668492 | 0           | 0           |
| ENSG00000153015.16 | CWC27     | 0.508087913 | 0           | 0           |
| ENSG00000138430.16 | OLA1      | 0.507713552 | 0           | 0           |
| ENSG00000111445.14 | RFC5      | 0.506232427 | 9.81358E-26 | 6.88676E-24 |
| ENSG00000100296.14 | THOC5     | 0.506205474 | 9.88129E-26 | 6.92564E-24 |
| ENSG00000247077.7  | PGAM5     | 0.505540795 | 0           | 0           |
| ENSG00000124541.7  | RRP36     | 0.505361414 | 0           | 0           |
| ENSG00000170606.15 | HSPA4     | 0.504759731 | 0           | 0           |
| ENSG00000113648.16 | MACROH2A1 | 0.504756749 | 0           | 0           |
| ENSG00000134308.14 | YWHAQ     | 0.504644579 | 0           | 0           |
| ENSG00000178982.10 | EIF3K     | 0.503557512 | 0           | 0           |
| ENSG00000163466.16 | ARPC2     | 0.503249674 | 0           | 0           |
| ENSG00000101146.13 | RAE1      | 0.50299643  | 0           | 0           |
| ENSG00000143933.19 | CALM2     | 0.502960875 | 0           | 0           |
| ENSG00000031698.13 | SARS1     | 0.502323637 | 0           | 0           |
| ENSG00000106245.11 | BUD31     | 0.501660019 | 0           | 0           |
| ENSG00000106636.9  | YKT6      | 0.501014752 | 0           | 0           |
| ENSG00000066322.15 | ELOVL1    | 0.500860834 | 0           | 0           |
| ENSG00000134453.16 | RBM17     | 0.500429356 | 0           | 0           |

|                    |         |             |             |             |
|--------------------|---------|-------------|-------------|-------------|
| ENSG00000131828.14 | PDHA1   | 0.500150191 | 0           | 0           |
| ENSG00000115944.15 | COX7A2L | 0.500033204 | 0           | 0           |
| ENSG00000106263.18 | EIF3B   | 0.499342977 | 0           | 0           |
| ENSG00000110851.12 | PRDM4   | 0.498524064 | 0           | 0           |
| ENSG00000172115.9  | CYCS    | 0.498474746 | 0           | 0           |
| ENSG00000115946.8  | PNO1    | 0.498098092 | 0           | 0           |
| ENSG00000105171.10 | POP4    | 0.497987068 | 0           | 0           |
| ENSG00000182973.19 | CNOT10  | 0.497971699 | 0           | 0           |
| ENSG00000170515.14 | PA2G4   | 0.497669826 | 0           | 0           |
| ENSG00000157837.16 | SPPL3   | 0.49754458  | 0           | 0           |
| ENSG00000115539.14 | PDCL3   | 0.497272756 | 0           | 0           |
| ENSG00000171314.9  | PGAM1   | 0.497253487 | 0           | 0           |
| ENSG00000100220.12 | RTCB    | 0.497059655 | 0           | 0           |
| ENSG00000122565.19 | CBX3    | 0.496425858 | 0           | 0           |
| ENSG00000119203.14 | CPSF3   | 0.495390775 | 1.48582E-24 | 1.04009E-22 |
| ENSG00000136270.14 | TBRG4   | 0.49523571  | 1.54363E-24 | 1.07922E-22 |
| ENSG00000099341.11 | PSMD8   | 0.494818081 | 0           | 0           |
| ENSG00000111229.16 | ARPC3   | 0.494457943 | 0           | 0           |
| ENSG00000155463.14 | OXA1L   | 0.493606228 | 0           | 0           |
| ENSG00000171720.10 | HDAC3   | 0.492776534 | 0           | 0           |
| ENSG00000143621.17 | ILF2    | 0.492132643 | 0           | 0           |
| ENSG00000138095.19 | LRPPRC  | 0.492128973 | 0           | 0           |
| ENSG00000184220.12 | CMSS1   | 0.492107209 | 3.32018E-24 | 2.3184E-22  |
| ENSG00000084090.13 | STARD7  | 0.491967026 | 0           | 0           |
| ENSG00000084092.7  | NOA1    | 0.491402044 | 0           | 0           |
| ENSG00000128626.12 | MRPS12  | 0.490723746 | 0           | 0           |
| ENSG00000104980.8  | TIMM44  | 0.4906063   | 0           | 0           |
| ENSG00000125741.5  | OPA3    | 0.490443664 | 0           | 0           |
| ENSG00000075336.12 | TIMM21  | 0.490425226 | 4.99551E-24 | 3.48392E-22 |
| ENSG00000111596.14 | CNOT2   | 0.489858639 | 5.72959E-24 | 3.99093E-22 |
| ENSG00000163170.12 | BOLA3   | 0.48961331  | 6.07955E-24 | 4.22946E-22 |
| ENSG00000130726.12 | TRIM28  | 0.489052659 | 0           | 0           |

|                    |          |             |             |             |
|--------------------|----------|-------------|-------------|-------------|
| ENSG00000049541.11 | RFC2     | 0.489036602 | 0           | 0           |
| ENSG00000124207.17 | CSE1L    | 0.488619575 | 0           | 0           |
| ENSG00000148459.16 | PDSS1    | 0.488617195 | 7.73042E-24 | 5.37131E-22 |
| ENSG00000135972.9  | MRPS9    | 0.48845304  | 0           | 0           |
| ENSG00000182481.10 | KPNA2    | 0.488373213 | 0           | 0           |
| ENSG00000174915.12 | PTDSS2   | 0.488337429 | 0           | 0           |
| ENSG00000128654.14 | MTX2     | 0.488176858 | 0           | 0           |
| ENSG00000105671.12 | DDX49    | 0.48765936  | 0           | 0           |
| ENSG00000167553.16 | TUBA1C   | 0.487482731 | 0           | 0           |
| ENSG00000106603.19 | COA1     | 0.487049332 | 1.12649E-23 | 7.81752E-22 |
| ENSG00000136026.14 | CKAP4    | 0.486998064 | 1.14041E-23 | 7.90436E-22 |
| ENSG00000137309.20 | HMGA1    | 0.48688337  | 1.17216E-23 | 8.11446E-22 |
| ENSG00000068796.19 | KIF2A    | 0.486654584 | 1.23813E-23 | 8.5606E-22  |
| ENSG00000139131.13 | YARS2    | 0.486596379 | 0           | 0           |
| ENSG00000023734.11 | STRAP    | 0.486444524 | 0           | 0           |
| ENSG00000149100.13 | EIF3M    | 0.485606572 | 0           | 0           |
| ENSG00000103671.10 | TRIP4    | 0.48560465  | 1.59097E-23 | 1.09867E-21 |
| ENSG00000105197.11 | TIMM50   | 0.485589368 | 0           | 0           |
| ENSG00000174243.10 | DDX23    | 0.485369385 | 0           | 0           |
| ENSG00000167378.8  | IRGQ     | 0.48534507  | 0           | 0           |
| ENSG00000124228.14 | DDX27    | 0.485078981 | 0           | 0           |
| ENSG00000254999.4  | BRK1     | 0.484976674 | 0           | 0           |
| ENSG00000067560.13 | RHOA     | 0.484884919 | 0           | 0           |
| ENSG00000175970.11 | UNC119B  | 0.484484006 | 2.07719E-23 | 1.43268E-21 |
| ENSG00000119718.11 | EIF2B2   | 0.483908101 | 2.38138E-23 | 1.64047E-21 |
| ENSG00000058804.12 | NDC1     | 0.483884589 | 2.39469E-23 | 1.64762E-21 |
| ENSG00000140553.18 | UNC45A   | 0.48376221  | 2.46516E-23 | 1.69404E-21 |
| ENSG00000151131.11 | C12orf45 | 0.483664001 | 2.5232E-23  | 1.7318E-21  |
| ENSG00000112996.11 | MRPS30   | 0.48359668  | 0           | 0           |
| ENSG00000091527.16 | CDV3     | 0.483545756 | 0           | 0           |
| ENSG00000123353.10 | ORMDL2   | 0.483541627 | 0           | 0           |
| ENSG00000183431.12 | SF3A3    | 0.483188829 | 0           | 0           |

|                    |         |             |             |             |
|--------------------|---------|-------------|-------------|-------------|
| ENSG00000196419.13 | XRCC6   | 0.483119783 | 0           | 0           |
| ENSG00000032389.13 | EIPR1   | 0.482471764 | 0           | 0           |
| ENSG00000134057.15 | CCNB1   | 0.482157962 | 0           | 0           |
| ENSG00000163636.11 | PSMD6   | 0.482135941 | 0           | 0           |
| ENSG00000113407.14 | TARS1   | 0.481127554 | 0           | 0           |
| ENSG00000101150.18 | TPD52L2 | 0.48049238  | 0           | 0           |
| ENSG00000130725.8  | UBE2M   | 0.480460523 | 5.36776E-23 | 3.6797E-21  |
| ENSG00000137409.19 | MTCH1   | 0.480291666 | 0           | 0           |
| ENSG00000102144.15 | PGK1    | 0.480262075 | 0           | 0           |
| ENSG00000120705.13 | ETF1    | 0.480211839 | 0           | 0           |
| ENSG00000265354.4  | TIMM23  | 0.480096687 | 0           | 0           |
| ENSG00000074800.16 | ENO1    | 0.479601898 | 0           | 0           |
| ENSG00000175792.12 | RUVBL1  | 0.479538271 | 6.66099E-23 | 4.56067E-21 |
| ENSG00000109971.14 | HSPA8   | 0.47945509  | 0           | 0           |
| ENSG00000181163.14 | NPM1    | 0.479227107 | 7.16315E-23 | 4.89853E-21 |
| ENSG00000089009.15 | RPL6    | 0.479222262 | 0           | 0           |
| ENSG00000100997.20 | ABHD12  | 0.479044257 | 0           | 0           |
| ENSG00000041357.16 | PSMA4   | 0.479035453 | 7.49082E-23 | 5.1164E-21  |
| ENSG00000178035.13 | IMPDH2  | 0.478658657 | 0           | 0           |
| ENSG00000170860.4  | LSM3    | 0.478445327 | 0           | 0           |
| ENSG00000143207.21 | COP1    | 0.478365041 | 0           | 0           |
| ENSG00000123395.14 | ATG101  | 0.477446602 | 1.08418E-22 | 7.39624E-21 |
| ENSG00000114491.14 | UMPS    | 0.47713346  | 0           | 0           |
| ENSG00000066117.15 | SMARCD1 | 0.476941261 | 1.21899E-22 | 8.30579E-21 |
| ENSG00000172500.13 | FIBP    | 0.476906367 | 0           | 0           |
| ENSG00000155636.15 | RBM45   | 0.47675087  | 1.27395E-22 | 8.6698E-21  |
| ENSG00000106244.13 | PDAP1   | 0.476645095 | 0           | 0           |
| ENSG00000160193.12 | WDR4    | 0.476397127 | 0           | 0           |
| ENSG00000113812.14 | ACTR8   | 0.476208112 | 0           | 0           |
| ENSG00000165283.16 | STOML2  | 0.476039741 | 0           | 0           |
| ENSG00000163754.18 | GYG1    | 0.476023684 | 0           | 0           |
| ENSG00000076242.16 | MLH1    | 0.476004902 | 1.51385E-22 | 1.029E-20   |

|                    |         |             |             |             |
|--------------------|---------|-------------|-------------|-------------|
| ENSG00000103769.10 | RAB11A  | 0.475915413 | 0           | 0           |
| ENSG00000086475.15 | SEPHS1  | 0.475895686 | 0           | 0           |
| ENSG00000100804.19 | PSMB5   | 0.475706671 | 0           | 0           |
| ENSG00000187522.16 | HSPA14  | 0.475682585 | 0           | 0           |
| ENSG00000075089.9  | ACTR6   | 0.475679603 | 0           | 0           |
| ENSG00000134283.18 | PPHLN1  | 0.475552981 | 0           | 0           |
| ENSG00000168439.17 | STIP1   | 0.475294921 | 0           | 0           |
| ENSG00000168924.15 | LETM1   | 0.475128642 | 1.85296E-22 | 1.25798E-20 |
| ENSG00000166913.13 | YWHAB   | 0.475095124 | 0           | 0           |
| ENSG00000121579.13 | NAA50   | 0.474914826 | 0           | 0           |
| ENSG00000132004.13 | FBXW9   | 0.474746739 | 2.02323E-22 | 1.37192E-20 |
| ENSG00000101052.13 | IFT52   | 0.474658971 | 2.06449E-22 | 1.39821E-20 |
| ENSG00000161204.11 | ABCF3   | 0.47420923  | 0           | 0           |
| ENSG00000011485.15 | PPP5C   | 0.473959198 | 0           | 0           |
| ENSG00000105341.19 | DMAC2   | 0.473853909 | 0           | 0           |
| ENSG00000075856.12 | SART3   | 0.473669738 | 2.59094E-22 | 1.75265E-20 |
| ENSG00000018699.13 | TTC27   | 0.473654112 | 0           | 0           |
| ENSG00000117906.14 | RCN2    | 0.473527491 | 0           | 0           |
| ENSG00000103591.13 | AAGAB   | 0.473473126 | 0           | 0           |
| ENSG00000135390.21 | ATP5MC2 | 0.473360955 | 0           | 0           |
| ENSG00000079785.16 | DDX1    | 0.473352697 | 0           | 0           |
| ENSG00000124164.16 | VAPB    | 0.473281817 | 0           | 0           |
| ENSG00000183955.13 | KMT5A   | 0.473113446 | 0           | 0           |
| ENSG00000125991.20 | ERGIC3  | 0.472919843 | 0           | 0           |
| ENSG00000176871.9  | WSB2    | 0.472860115 | 3.11856E-22 | 2.10703E-20 |
| ENSG00000074319.13 | TSG101  | 0.472658571 | 0           | 0           |
| ENSG00000105726.17 | ATP13A1 | 0.472464307 | 3.41373E-22 | 2.30369E-20 |
| ENSG00000057608.17 | GDI2    | 0.472259896 | 0           | 0           |
| ENSG00000123416.15 | TUBA1B  | 0.472075927 | 0           | 0           |
| ENSG00000135632.12 | SMYD5   | 0.472040602 | 0           | 0           |
| ENSG00000139372.15 | TDG     | 0.471961922 | 0           | 0           |
| ENSG00000141543.12 | EIF4A3  | 0.471961234 | 0           | 0           |

|                    |         |             |             |             |
|--------------------|---------|-------------|-------------|-------------|
| ENSG00000182544.9  | MFSD5   | 0.471926367 | 0           | 0           |
| ENSG00000229117.9  | RPL41   | 0.471683445 | 0           | 0           |
| ENSG00000108039.18 | XPNPEP1 | 0.471602242 | 0           | 0           |
| ENSG00000130520.11 | LSM4    | 0.471453599 | 0           | 0           |
| ENSG00000181991.16 | MRPS11  | 0.4713935   | 0           | 0           |
| ENSG00000111530.13 | CAND1   | 0.471352669 | 0           | 0           |
| ENSG00000130204.13 | TOMM40  | 0.471210907 | 0           | 0           |
| ENSG00000115317.12 | HTRA2   | 0.471166406 | 0           | 0           |
| ENSG00000143179.16 | UCK2    | 0.471079468 | 0           | 0           |
| ENSG00000213619.11 | NDUFS3  | 0.470958581 | 0           | 0           |
| ENSG00000121774.18 | KHDRBS1 | 0.470845034 | 0           | 0           |
| ENSG00000101182.15 | PSMA7   | 0.470610142 | 0           | 0           |
| ENSG00000138363.15 | ATIC    | 0.470520681 | 0           | 0           |
| ENSG00000131148.9  | EMC8    | 0.47041691  | 5.43969E-22 | 3.66648E-20 |
| ENSG00000165733.8  | BMS1    | 0.470402317 | 0           | 0           |
| ENSG00000128708.13 | HAT1    | 0.470379864 | 5.48558E-22 | 3.69299E-20 |
| ENSG00000140350.15 | ANP32A  | 0.470231423 | 0           | 0           |
| ENSG00000169100.14 | SLC25A6 | 0.470110307 | 0           | 0           |
| ENSG00000085760.15 | MTIF2   | 0.469934596 | 0           | 0           |
| ENSG00000064726.10 | BTBD1   | 0.469784347 | 0           | 0           |
| ENSG00000101361.17 | NOP56   | 0.469767831 | 0           | 0           |
| ENSG00000144589.22 | STK11IP | 0.469527663 | 0           | 0           |
| ENSG00000144848.11 | ATG3    | 0.469516193 | 0           | 0           |
| ENSG00000138092.11 | CENPO   | 0.469253228 | 7.07908E-22 | 4.76007E-20 |
| ENSG00000136522.14 | MRPL47  | 0.469140686 | 0           | 0           |
| ENSG00000123352.18 | SPATS2  | 0.468617454 | 0           | 0           |
| ENSG00000134058.12 | CDK7    | 0.468535792 | 0           | 0           |
| ENSG00000134287.10 | ARF3    | 0.468515376 | 0           | 0           |
| ENSG00000100991.12 | TRPC4AP | 0.468202721 | 0           | 0           |
| ENSG00000156261.13 | CCT8    | 0.468004301 | 0           | 0           |
| ENSG00000115514.12 | TXNDC9  | 0.467927686 | 0           | 0           |
| ENSG00000108091.11 | CCDC6   | 0.467734798 | 9.96778E-22 | 6.69447E-20 |

|                    |          |             |             |             |
|--------------------|----------|-------------|-------------|-------------|
| ENSG00000166847.10 | DCTN5    | 0.467249987 | 1.11146E-21 | 7.45581E-20 |
| ENSG00000114686.9  | MRPL3    | 0.466964259 | 0           | 0           |
| ENSG00000137547.9  | MRPL15   | 0.46690453  | 1.20102E-21 | 8.03897E-20 |
| ENSG00000188735.13 | TMEM120B | 0.466903666 | 1.20125E-21 | 8.03897E-20 |
| ENSG00000104886.12 | PLEKHJ1  | 0.466713309 | 0           | 0           |
| ENSG00000112312.10 | GMNN     | 0.466582699 | 1.29083E-21 | 8.6282E-20  |
| ENSG00000145919.11 | BOD1     | 0.466578429 | 0           | 0           |
| ENSG00000100029.18 | PES1     | 0.465714097 | 0           | 0           |
| ENSG00000143799.14 | PARP1    | 0.465571648 | 0           | 0           |
| ENSG00000144118.14 | RALB     | 0.465547562 | 0           | 0           |
| ENSG00000185721.13 | DRG1     | 0.465454201 | 0           | 0           |
| ENSG00000102900.13 | NUP93    | 0.464961893 | 1.85396E-21 | 1.23775E-19 |
| ENSG00000104824.17 | HNRNPL   | 0.464738971 | 0           | 0           |
| ENSG00000169230.10 | PRELID1  | 0.464678184 | 0           | 0           |
| ENSG00000139719.11 | VPS33A   | 0.464614097 | 2.00323E-21 | 1.33582E-19 |
| ENSG00000132153.15 | DHX30    | 0.464538258 | 0           | 0           |
| ENSG00000135372.9  | NAT10    | 0.464461413 | 0           | 0           |
| ENSG00000226479.4  | TMEM185B | 0.464367364 | 0           | 0           |
| ENSG00000004487.17 | KDM1A    | 0.464353142 | 0           | 0           |
| ENSG00000111412.6  | SPRING1  | 0.463702396 | 2.45303E-21 | 1.63384E-19 |
| ENSG00000102172.16 | SMS      | 0.463665668 | 0           | 0           |
| ENSG00000113558.19 | SKP1     | 0.463579559 | 2.52079E-21 | 1.67698E-19 |
| ENSG00000183258.12 | DDX41    | 0.463152528 | 0           | 0           |
| ENSG00000173545.5  | ZNF622   | 0.462816246 | 0           | 0           |
| ENSG00000088986.11 | DYNLL1   | 0.462755459 | 0           | 0           |
| ENSG00000215305.10 | VPS16    | 0.462708664 | 0           | 0           |
| ENSG00000101391.21 | CDK5RAP1 | 0.462464393 | 3.22658E-21 | 2.14398E-19 |
| ENSG00000143549.21 | TPM3     | 0.462376052 | 0           | 0           |
| ENSG00000058262.10 | SEC61A1  | 0.462061332 | 0           | 0           |
| ENSG00000105700.11 | KXD1     | 0.46203303  | 3.549E-21   | 2.35544E-19 |
| ENSG00000144381.18 | HSPD1    | 0.461986323 | 0           | 0           |
| ENSG00000120314.18 | WDR55    | 0.461925906 | 3.63386E-21 | 2.40892E-19 |

|                    |          |             |             |             |
|--------------------|----------|-------------|-------------|-------------|
| ENSG00000179010.14 | MRFAP1   | 0.46184892  | 0           | 0           |
| ENSG00000111231.9  | GPN3     | 0.461777351 | 0           | 0           |
| ENSG00000103855.18 | CD276    | 0.461714499 | 0           | 0           |
| ENSG00000185414.20 | MRPL30   | 0.461343579 | 0           | 0           |
| ENSG00000149136.9  | SSRP1    | 0.461128185 | 0           | 0           |
| ENSG00000176946.12 | THAP4    | 0.460974036 | 0           | 0           |
| ENSG00000130021.15 | PUDP     | 0.460851111 | 4.60405E-21 | 3.04489E-19 |
| ENSG00000196290.16 | NIF3L1   | 0.460829981 | 0           | 0           |
| ENSG00000115053.17 | NCL      | 0.46082677  | 0           | 0           |
| ENSG00000146828.18 | SLC12A9  | 0.460661381 | 0           | 0           |
| ENSG00000011260.14 | UTP18    | 0.460521914 | 0           | 0           |
| ENSG00000071626.17 | DAZAP1   | 0.460449454 | 5.02867E-21 | 3.32181E-19 |
| ENSG00000133706.19 | LARS1    | 0.460383134 | 0           | 0           |
| ENSG00000131876.17 | SNRPA1   | 0.46033978  | 0           | 0           |
| ENSG00000134077.16 | THUMPD3  | 0.460327164 | 0           | 0           |
| ENSG00000090621.15 | PABPC4   | 0.460213617 | 0           | 0           |
| ENSG00000117419.16 | ERI3     | 0.460043182 | 0           | 0           |
| ENSG00000140259.7  | MFAP1    | 0.460013388 | 5.53338E-21 | 3.65093E-19 |
| ENSG00000179222.18 | MAGED1   | 0.459678915 | 0           | 0           |
| ENSG00000183020.14 | AP2A2    | 0.459443564 | 0           | 0           |
| ENSG00000065518.8  | NDUFB4   | 0.459423607 | 0           | 0           |
| ENSG00000163655.16 | GMPS     | 0.459113704 | 0           | 0           |
| ENSG00000187109.15 | NAP1L1   | 0.459053146 | 0           | 0           |
| ENSG00000148843.15 | PDCD11   | 0.458878035 | 7.09351E-21 | 4.67482E-19 |
| ENSG00000122965.11 | RBM19    | 0.458687503 | 0           | 0           |
| ENSG00000131100.13 | ATP6V1E1 | 0.458225058 | 0           | 0           |
| ENSG00000004961.15 | HCCS     | 0.457911626 | 8.75716E-21 | 5.76446E-19 |
| ENSG00000115761.16 | NOL10    | 0.457770871 | 0           | 0           |
| ENSG00000135148.12 | TRAFD1   | 0.457697696 | 0           | 0           |
| ENSG00000138399.18 | FASTKD1  | 0.457577038 | 0           | 0           |
| ENSG00000127184.13 | COX7C    | 0.457560522 | 0           | 0           |
| ENSG00000160818.17 | GPATCH4  | 0.457072615 | 0           | 0           |

|                    |          |             |             |             |
|--------------------|----------|-------------|-------------|-------------|
| ENSG00000159055.4  | MIS18A   | 0.456887755 | 1.09393E-20 | 7.19246E-19 |
| ENSG00000120800.5  | UTP20    | 0.456666829 | 0           | 0           |
| ENSG00000124356.16 | STAMBP   | 0.456635174 | 0           | 0           |
| ENSG00000124155.18 | PIGT     | 0.45629591  | 0           | 0           |
| ENSG00000144034.16 | TPRKB    | 0.45620464  | 1.26846E-20 | 8.33023E-19 |
| ENSG00000106268.15 | NUDT1    | 0.45607501  | 0           | 0           |
| ENSG00000062485.19 | CS       | 0.45604496  | 0           | 0           |
| ENSG00000100353.18 | EIF3D    | 0.455945406 | 0           | 0           |
| ENSG00000132768.14 | DPH2     | 0.455883242 | 0           | 0           |
| ENSG00000060688.13 | SNRNP40  | 0.455869249 | 0           | 0           |
| ENSG00000143947.14 | RPS27A   | 0.455849522 | 0           | 0           |
| ENSG00000005175.10 | RPAP3    | 0.455688951 | 0           | 0           |
| ENSG00000100216.6  | TOMM22   | 0.455669453 | 0           | 0           |
| ENSG00000089006.17 | SNX5     | 0.455595131 | 0           | 0           |
| ENSG00000205531.13 | NAP1L4   | 0.455196023 | 1.57736E-20 | 1.03468E-18 |
| ENSG00000139433.11 | GLTP     | 0.455192786 | 0           | 0           |
| ENSG00000143727.16 | ACP1     | 0.454825307 | 0           | 0           |
| ENSG00000176915.15 | ANKLE2   | 0.454673249 | 1.76551E-20 | 1.15675E-18 |
| ENSG00000197157.11 | SND1     | 0.454466087 | 0           | 0           |
| ENSG00000139697.14 | SBNO1    | 0.454200138 | 1.95472E-20 | 1.27923E-18 |
| ENSG00000111605.18 | CPSF6    | 0.453688234 | 0           | 0           |
| ENSG00000164815.11 | ORC5     | 0.453608178 | 0           | 0           |
| ENSG00000096384.20 | HSP90AB1 | 0.453443478 | 0           | 0           |
| ENSG00000175390.15 | EIF3F    | 0.453412051 | 0           | 0           |
| ENSG00000163918.11 | RFC4     | 0.453398518 | 0           | 0           |
| ENSG00000101343.15 | CRNKL1   | 0.453383086 | 2.32961E-20 | 1.52279E-18 |
| ENSG00000145741.16 | BTF3     | 0.453263179 | 0           | 0           |
| ENSG00000131467.11 | PSME3    | 0.453130822 | 0           | 0           |
| ENSG00000115233.12 | PSMD14   | 0.45311683  | 0           | 0           |
| ENSG00000136261.15 | BZW2     | 0.453103067 | 0           | 0           |
| ENSG00000096063.16 | SRPK1    | 0.45297535  | 2.54232E-20 | 1.65799E-18 |
| ENSG00000166900.17 | STX3     | 0.452855328 | 0           | 0           |

|                    |           |             |             |             |
|--------------------|-----------|-------------|-------------|-------------|
| ENSG00000110880.11 | CORO1C    | 0.452843171 | 0           | 0           |
| ENSG00000121152.10 | NCAPH     | 0.452795458 | 0           | 0           |
| ENSG00000085840.13 | ORC1      | 0.452313056 | 0           | 0           |
| ENSG00000173653.8  | RCE1      | 0.452246305 | 0           | 0           |
| ENSG00000169679.15 | BUB1      | 0.452175883 | 0           | 0           |
| ENSG00000171262.11 | FAM98B    | 0.452135192 | 3.04274E-20 | 1.98204E-18 |
| ENSG00000101367.9  | MAPRE1    | 0.452018982 | 0           | 0           |
| ENSG00000172354.10 | GNB2      | 0.451971957 | 0           | 0           |
| ENSG00000128595.17 | CALU      | 0.451900618 | 0           | 0           |
| ENSG00000149357.10 | LAMTOR1   | 0.451802899 | 0           | 0           |
| ENSG00000068394.11 | GPKOW     | 0.451762985 | 0           | 0           |
| ENSG00000162522.11 | KIAA1522  | 0.451701051 | 0           | 0           |
| ENSG00000116062.17 | MSH6      | 0.451681782 | 0           | 0           |
| ENSG00000167645.17 | YIF1B     | 0.451573741 | 0           | 0           |
| ENSG00000087053.20 | MTMR2     | 0.451442468 | 3.52731E-20 | 2.29503E-18 |
| ENSG00000054116.12 | TRAPPC3   | 0.451111322 | 3.78505E-20 | 2.45989E-18 |
| ENSG00000181274.7  | FRAT2     | 0.451074135 | 0           | 0           |
| ENSG00000168818.10 | STX18     | 0.450945131 | 3.9213E-20  | 2.5455E-18  |
| ENSG00000142687.18 | KIAA0319L | 0.450918152 | 0           | 0           |
| ENSG00000152455.16 | SUV39H2   | 0.450878149 | 3.97757E-20 | 2.57905E-18 |
| ENSG00000101464.11 | PIGU      | 0.450752993 | 0           | 0           |
| ENSG00000119977.21 | TCTN3     | 0.450696793 | 0           | 0           |
| ENSG00000146143.19 | PRIM2     | 0.450516953 | 0           | 0           |
| ENSG00000151465.14 | CDC123    | 0.45036831  | 0           | 0           |
| ENSG00000159131.17 | GART      | 0.45033482  | 0           | 0           |
| ENSG00000184992.13 | BRI3BP    | 0.450284125 | 0           | 0           |
| ENSG00000168002.12 | POLR2G    | 0.450228154 | 0           | 0           |
| ENSG00000213719.8  | CLIC1     | 0.450186177 | 0           | 0           |
| ENSG00000100823.12 | APEX1     | 0.450037534 | 0           | 0           |
| ENSG00000116874.12 | WARS2     | 0.449953259 | 4.84081E-20 | 3.13156E-18 |
| ENSG00000170266.16 | GLB1      | 0.449857923 | 0           | 0           |
| ENSG00000169599.13 | NFU1      | 0.449645791 | 5.16675E-20 | 3.33858E-18 |

|                    |          |             |             |             |
|--------------------|----------|-------------|-------------|-------------|
| ENSG00000084623.12 | EIF3I    | 0.449584405 | 5.23437E-20 | 3.37839E-18 |
| ENSG00000196141.14 | SPATS2L  | 0.449405801 | 0           | 0           |
| ENSG00000092841.19 | MYL6     | 0.449312211 | 0           | 0           |
| ENSG00000131475.7  | VPS25    | 0.449020341 | 5.89789E-20 | 3.80228E-18 |
| ENSG00000057935.14 | MTA3     | 0.449019053 | 0           | 0           |
| ENSG00000131043.12 | AAR2     | 0.448980058 | 0           | 0           |
| ENSG00000112118.20 | MCM3     | 0.448930994 | 6.01032E-20 | 3.87033E-18 |
| ENSG00000113575.10 | PPP2CA   | 0.448651346 | 0           | 0           |
| ENSG00000101166.16 | PRELID3B | 0.448571289 | 0           | 0           |
| ENSG00000132383.12 | RPA1     | 0.44855225  | 0           | 0           |
| ENSG00000181610.13 | MRPS23   | 0.448407048 | 0           | 0           |
| ENSG00000125870.11 | SNRPB2   | 0.448224914 | 0           | 0           |
| ENSG00000101266.19 | CSNK2A1  | 0.448132752 | 7.11316E-20 | 4.57527E-18 |
| ENSG00000132275.11 | RRP8     | 0.447936804 | 0           | 0           |
| ENSG00000176619.13 | LMNB2    | 0.447901937 | 0           | 0           |
| ENSG00000114209.15 | PDCD10   | 0.447820759 | 7.59638E-20 | 4.8805E-18  |
| ENSG00000111581.10 | NUP107   | 0.447560634 | 8.02385E-20 | 5.14927E-18 |
| ENSG00000136982.6  | DSCC1    | 0.447488351 | 0           | 0           |
| ENSG00000164062.13 | APEH     | 0.447244194 | 8.57589E-20 | 5.49726E-18 |
| ENSG00000130741.11 | EIF2S3   | 0.447209646 | 0           | 0           |
| ENSG00000164032.12 | H2AZ1    | 0.446994939 | 0           | 0           |
| ENSG00000167088.11 | SNRPD1   | 0.446984846 | 0           | 0           |
| ENSG00000177731.16 | FLII     | 0.446981405 | 0           | 0           |
| ENSG00000138385.16 | SSB      | 0.446978423 | 0           | 0           |
| ENSG00000133773.12 | CCDC59   | 0.446768075 | 0           | 0           |
| ENSG00000135404.12 | CD63     | 0.446457943 | 0           | 0           |
| ENSG00000156603.19 | MED19    | 0.446327192 | 0           | 0           |
| ENSG00000250317.8  | SMIM20   | 0.446187037 | 0           | 0           |
| ENSG00000102225.16 | CDK16    | 0.44575877  | 0           | 0           |
| ENSG00000105568.18 | PPP2R1A  | 0.445678026 | 0           | 0           |
| ENSG00000088832.18 | FKBP1A   | 0.445611504 | 0           | 0           |
| ENSG00000139645.10 | ANKRD52  | 0.445525968 | 1.2293E-19  | 7.871E-18   |

|                    |         |             |             |             |
|--------------------|---------|-------------|-------------|-------------|
| ENSG00000136044.12 | APPL2   | 0.445373858 | 0           | 0           |
| ENSG00000134001.15 | EIF2S1  | 0.445273208 | 1.29594E-19 | 8.28829E-18 |
| ENSG00000101079.21 | NDRG3   | 0.445255953 | 0           | 0           |
| ENSG00000179195.16 | ZNF664  | 0.445250588 | 1.30208E-19 | 8.31808E-18 |
| ENSG00000117410.14 | ATP6V0B | 0.445112357 | 0           | 0           |
| ENSG00000170545.17 | SMAGP   | 0.445045287 | 1.35908E-19 | 8.67239E-18 |
| ENSG00000105677.12 | TMEM147 | 0.4447558   | 1.44365E-19 | 9.20162E-18 |
| ENSG00000079246.16 | XRCC5   | 0.44470313  | 0           | 0           |
| ENSG00000135387.21 | CAPRIN1 | 0.44465794  | 0           | 0           |
| ENSG00000140525.19 | FANCI   | 0.444496362 | 1.52384E-19 | 9.7017E-18  |
| ENSG00000094914.14 | AAAS    | 0.444273971 | 1.59605E-19 | 1.01499E-17 |
| ENSG00000069509.6  | FUNDC1  | 0.444244839 | 1.60575E-19 | 1.02001E-17 |
| ENSG00000095485.18 | CWF19L1 | 0.444131496 | 0           | 0           |
| ENSG00000102054.18 | RBBP7   | 0.444069103 | 0           | 0           |
| ENSG00000185787.15 | MORF4L1 | 0.443926424 | 0           | 0           |
| ENSG00000116455.14 | WDR77   | 0.443881005 | 0           | 0           |
| ENSG00000124357.13 | NAGK    | 0.443655059 | 0           | 0           |
| ENSG00000071539.14 | TRIP13  | 0.443566362 | 1.84894E-19 | 1.17317E-17 |
| ENSG00000161800.13 | RACGAP1 | 0.443447463 | 0           | 0           |
| ENSG00000174446.13 | SNAPC5  | 0.443428883 | 0           | 0           |
| ENSG00000138382.15 | METTL5  | 0.443365024 | 1.92784E-19 | 1.22186E-17 |
| ENSG00000101310.17 | SEC23B  | 0.443209614 | 1.991E-19   | 1.26047E-17 |
| ENSG00000131944.10 | FAAP24  | 0.442909779 | 0           | 0           |
| ENSG00000125863.20 | MKKS    | 0.442762882 | 2.18412E-19 | 1.38117E-17 |
| ENSG00000113569.16 | NUP155  | 0.44257602  | 0           | 0           |
| ENSG00000136682.15 | CBWD2   | 0.4425449   | 2.28493E-19 | 1.44168E-17 |
| ENSG00000088888.18 | MAVS    | 0.442230792 | 0           | 0           |
| ENSG00000166508.18 | MCM7    | 0.442209459 | 0           | 0           |
| ENSG00000081721.12 | DUSP12  | 0.44218861  | 2.45964E-19 | 1.55018E-17 |
| ENSG00000164284.15 | GRPEL2  | 0.442015627 | 0           | 0           |
| ENSG00000090615.15 | GOLGA3  | 0.441840604 | 0           | 0           |
| ENSG00000205629.12 | LCMT1   | 0.441679421 | 2.73236E-19 | 1.71821E-17 |

|                    |          |             |             |             |
|--------------------|----------|-------------|-------------|-------------|
| ENSG00000146733.14 | PSPH     | 0.441552404 | 2.8049E-19  | 1.76186E-17 |
| ENSG00000104738.18 | MCM4     | 0.441543548 | 0           | 0           |
| ENSG00000118600.12 | RXYLT1   | 0.441521985 | 0           | 0           |
| ENSG00000157456.8  | CCNB2    | 0.441245344 | 0           | 0           |
| ENSG00000198324.13 | PHETA1   | 0.441045548 | 0           | 0           |
| ENSG00000197136.4  | PCNX3    | 0.441025362 | 0           | 0           |
| ENSG00000114784.4  | EIF1B    | 0.441020774 | 0           | 0           |
| ENSG00000128534.8  | LSM8     | 0.440973456 | 3.16027E-19 | 1.98287E-17 |
| ENSG00000155229.21 | MMS19    | 0.440935212 | 0           | 0           |
| ENSG00000065548.18 | ZC3H15   | 0.440910209 | 0           | 0           |
| ENSG00000161203.13 | AP2M1    | 0.4408836   | 0           | 0           |
| ENSG00000126787.13 | DLGAP5   | 0.440795515 | 0           | 0           |
| ENSG00000122705.17 | CLTA     | 0.440765695 | 0           | 0           |
| ENSG00000187118.14 | CMC1     | 0.440577737 | 3.42829E-19 | 2.14625E-17 |
| ENSG00000196465.10 | MYL6B    | 0.440012616 | 0           | 0           |
| ENSG00000167173.19 | C15orf39 | 0.439997477 | 0           | 0           |
| ENSG00000197746.14 | PSAP     | 0.439990366 | 0           | 0           |
| ENSG00000090316.16 | MAEA     | 0.43998486  | 0           | 0           |
| ENSG00000160124.9  | CCDC58   | 0.439947241 | 0           | 0           |
| ENSG00000113141.18 | IK       | 0.43987659  | 0           | 0           |
| ENSG00000123136.15 | DDX39A   | 0.439843099 | 0           | 0           |
| ENSG00000109919.10 | MTCH2    | 0.43973414  | 0           | 0           |
| ENSG00000084733.11 | RAB10    | 0.439632521 | 0           | 0           |
| ENSG00000160917.15 | CPSF4    | 0.439612106 | 0           | 0           |
| ENSG00000197798.9  | FAM118B  | 0.439428137 | 0           | 0           |
| ENSG00000112855.17 | HARS2    | 0.439396622 | 4.36844E-19 | 2.73178E-17 |
| ENSG00000143977.14 | SNRPG    | 0.439268484 | 0           | 0           |
| ENSG00000087586.18 | AURKA    | 0.43924348  | 0           | 0           |
| ENSG00000174989.13 | FBXW8    | 0.439121611 | 4.62139E-19 | 2.88675E-17 |
| ENSG00000177963.14 | RIC8A    | 0.438931284 | 0           | 0           |
| ENSG00000166598.15 | HSP90B1  | 0.438862927 | 0           | 0           |
| ENSG00000119772.17 | DNMT3A   | 0.438857192 | 0           | 0           |

|                    |         |             |             |             |
|--------------------|---------|-------------|-------------|-------------|
| ENSG00000139350.12 | NEDD1   | 0.438763373 | 0           | 0           |
| ENSG00000172534.14 | HCFC1   | 0.438760849 | 0           | 0           |
| ENSG00000185651.15 | UBE2L3  | 0.438750527 | 0           | 0           |
| ENSG00000014641.21 | MDH1    | 0.438684833 | 5.05306E-19 | 3.14592E-17 |
| ENSG00000198898.14 | CAPZA2  | 0.438460811 | 0           | 0           |
| ENSG00000172531.16 | PPP1CA  | 0.438376396 | 0           | 0           |
| ENSG00000164258.12 | NDUFS4  | 0.438216513 | 0           | 0           |
| ENSG00000125843.11 | AP5S1   | 0.438209542 | 5.56791E-19 | 3.46262E-17 |
| ENSG00000139168.9  | ZCRB1   | 0.438106203 | 5.6865E-19  | 3.53247E-17 |
| ENSG00000141076.18 | UTP4    | 0.438087967 | 5.70768E-19 | 3.54172E-17 |
| ENSG00000162396.6  | PARS2   | 0.437992172 | 0           | 0           |
| ENSG00000244038.11 | DDOST   | 0.437977491 | 0           | 0           |
| ENSG00000170473.17 | PYM1    | 0.437867156 | 0           | 0           |
| ENSG00000061794.13 | MRPS35  | 0.437654285 | 0           | 0           |
| ENSG00000178149.17 | DALRD3  | 0.437642586 | 0           | 0           |
| ENSG00000177733.7  | HNRNPA0 | 0.437626758 | 0           | 0           |
| ENSG00000153187.20 | HNRNPU  | 0.437624005 | 0           | 0           |
| ENSG00000167325.15 | RRM1    | 0.437608178 | 0           | 0           |
| ENSG00000103550.14 | KNOP1   | 0.437518627 | 6.40956E-19 | 3.97287E-17 |
| ENSG00000004478.8  | FKBP4   | 0.437377095 | 6.59682E-19 | 4.07833E-17 |
| ENSG00000100442.11 | FKBP3   | 0.437373654 | 6.60144E-19 | 4.07833E-17 |
| ENSG00000158195.11 | WASF2   | 0.437371679 | 0           | 0           |
| ENSG00000179115.11 | FARSA   | 0.43737145  | 0           | 0           |
| ENSG00000087365.16 | SF3B2   | 0.437186793 | 0           | 0           |
| ENSG00000092020.10 | PPP2R3C | 0.437108966 | 6.96645E-19 | 4.29911E-17 |
| ENSG00000136628.18 | EPRS1   | 0.436933549 | 0           | 0           |
| ENSG00000127837.10 | AAMP    | 0.436908776 | 0           | 0           |
| ENSG00000197111.16 | PCBP2   | 0.436784677 | 0           | 0           |
| ENSG00000124226.11 | RNF114  | 0.436667919 | 0           | 0           |
| ENSG00000145191.15 | EIF2B5  | 0.436452983 | 0           | 0           |
| ENSG00000125445.11 | MRPS7   | 0.436131152 | 0           | 0           |
| ENSG00000089195.15 | TRMT6   | 0.436085529 | 8.57417E-19 | 5.28547E-17 |

|                    |         |             |             |             |
|--------------------|---------|-------------|-------------|-------------|
| ENSG00000070814.22 | TCOF1   | 0.435996093 | 8.73089E-19 | 5.37618E-17 |
| ENSG00000095002.15 | MSH2    | 0.435993979 | 0           | 0           |
| ENSG00000213551.7  | DNAJC9  | 0.435784917 | 9.11219E-19 | 5.60484E-17 |
| ENSG00000035499.13 | DEPDC1B | 0.435669166 | 0           | 0           |
| ENSG00000132128.16 | LRRC41  | 0.435621224 | 0           | 0           |
| ENSG00000254986.7  | DPP3    | 0.435493939 | 9.66455E-19 | 5.9381E-17  |
| ENSG00000131236.18 | CAP1    | 0.43547281  | 0           | 0           |
| ENSG00000067225.18 | PKM     | 0.435392525 | 0           | 0           |
| ENSG00000136271.10 | DDX56   | 0.435372798 | 0           | 0           |
| ENSG00000062822.15 | POLD1   | 0.435345321 | 9.95924E-19 | 6.1125E-17  |
| ENSG00000116120.11 | FARSB   | 0.435312838 | 1.00248E-18 | 6.14604E-17 |
| ENSG00000138069.18 | RAB1A   | 0.435289071 | 0           | 0           |
| ENSG00000138231.13 | DBR1    | 0.435284713 | 0           | 0           |
| ENSG00000141030.13 | COPS3   | 0.435277831 | 0           | 0           |
| ENSG00000164916.11 | FOXK1   | 0.43520351  | 0           | 0           |
| ENSG00000086598.11 | TMED2   | 0.435161302 | 0           | 0           |
| ENSG00000103429.11 | BFAR    | 0.435136758 | 0           | 0           |
| ENSG00000068438.15 | FTSJ1   | 0.435036057 | 0           | 0           |
| ENSG00000189043.10 | NDUFA4  | 0.434733954 | 0           | 0           |
| ENSG00000213281.5  | NRAS    | 0.434362805 | 0           | 0           |
| ENSG00000183605.17 | SFXN4   | 0.434334042 | 1.22129E-18 | 7.47937E-17 |
| ENSG00000174780.17 | SRP72   | 0.434327938 | 0           | 0           |
| ENSG00000087087.20 | SRRT    | 0.434319909 | 0           | 0           |
| ENSG00000184831.14 | APOO    | 0.434217373 | 0           | 0           |
| ENSG00000106028.11 | SSBP1   | 0.43406506  | 0           | 0           |
| ENSG00000087111.21 | PIGS    | 0.434028522 | 1.29875E-18 | 7.9451E-17  |
| ENSG00000196531.14 | NACA    | 0.434018724 | 0           | 0           |
| ENSG00000139624.14 | CERS5   | 0.433858481 | 1.34393E-18 | 8.21258E-17 |
| ENSG00000153046.18 | CDYL    | 0.433827185 | 0           | 0           |
| ENSG00000124562.10 | SNRPC   | 0.433781308 | 0           | 0           |
| ENSG00000115207.13 | GTF3C2  | 0.433704169 | 1.38627E-18 | 8.46213E-17 |
| ENSG00000180104.16 | EXOC3   | 0.433696664 | 0           | 0           |

|                    |          |             |             |             |
|--------------------|----------|-------------|-------------|-------------|
| ENSG00000123130.17 | ACOT9    | 0.433501455 | 0           | 0           |
| ENSG00000155868.8  | MED7     | 0.433487602 | 1.44792E-18 | 8.82883E-17 |
| ENSG00000111300.10 | NAA25    | 0.433439112 | 1.46208E-18 | 8.90086E-17 |
| ENSG00000163812.15 | ZDHHC3   | 0.433436359 | 1.46289E-18 | 8.90086E-17 |
| ENSG00000166908.18 | PIP4K2C  | 0.433410618 | 0           | 0           |
| ENSG00000137996.13 | RTCA     | 0.433395274 | 1.47501E-18 | 8.96489E-17 |
| ENSG00000083937.10 | CHMP2B   | 0.433343407 | 0           | 0           |
| ENSG00000163468.15 | CCT3     | 0.433232384 | 0           | 0           |
| ENSG00000107949.17 | BCCIP    | 0.433053691 | 0           | 0           |
| ENSG00000169019.11 | COMMD8   | 0.433011713 | 0           | 0           |
| ENSG00000141627.14 | DYM      | 0.432953957 | 1.61155E-18 | 9.78419E-17 |
| ENSG00000110917.8  | MLEC     | 0.432815357 | 0           | 0           |
| ENSG00000163607.17 | GTPBP8   | 0.432777444 | 1.66957E-18 | 1.01256E-16 |
| ENSG00000052749.14 | RRP12    | 0.43276948  | 0           | 0           |
| ENSG00000105926.16 | MPP6     | 0.432767645 | 0           | 0           |
| ENSG00000167196.14 | FBXO22   | 0.432665273 | 1.70751E-18 | 1.03445E-16 |
| ENSG00000152683.14 | SLC30A6  | 0.432628407 | 0           | 0           |
| ENSG00000134291.12 | TMEM106C | 0.432623131 | 0           | 0           |
| ENSG00000040275.17 | SPDL1    | 0.432609622 | 1.72665E-18 | 1.04492E-16 |
| ENSG00000179151.13 | EDC3     | 0.432380923 | 1.80752E-18 | 1.09269E-16 |
| ENSG00000132432.14 | SEC61G   | 0.432316669 | 0           | 0           |
| ENSG00000113360.16 | DROSHA   | 0.432215993 | 1.86815E-18 | 1.12812E-16 |
| ENSG00000168883.20 | USP39    | 0.432118937 | 0           | 0           |
| ENSG00000163507.14 | CIP2A    | 0.432101643 | 1.91135E-18 | 1.15298E-16 |
| ENSG00000115128.7  | SF3B6    | 0.432070766 | 0           | 0           |
| ENSG00000155561.15 | NUP205   | 0.432001057 | 1.95016E-18 | 1.17513E-16 |
| ENSG00000166851.15 | PLK1     | 0.431764763 | 0           | 0           |
| ENSG00000155034.19 | FBXL18   | 0.431712488 | 2.06587E-18 | 1.24352E-16 |
| ENSG00000101138.12 | CSTF1    | 0.431292823 | 2.24627E-18 | 1.35067E-16 |
| ENSG00000101294.18 | HM13     | 0.431258505 | 0           | 0           |
| ENSG00000101444.13 | AHCY     | 0.431240613 | 0           | 0           |
| ENSG00000100139.13 | MICALL1  | 0.431128287 | 2.32116E-18 | 1.39421E-16 |

|                    |         |             |             |             |
|--------------------|---------|-------------|-------------|-------------|
| ENSG00000080845.18 | DLGAP4  | 0.43097223  | 0           | 0           |
| ENSG00000204574.14 | ABCF1   | 0.430971771 | 0           | 0           |
| ENSG00000128524.5  | ATP6V1F | 0.43087864  | 0           | 0           |
| ENSG00000154813.10 | DPH3    | 0.43087841  | 0           | 0           |
| ENSG00000101057.16 | MYBL2   | 0.430741237 | 0           | 0           |
| ENSG00000172244.9  | C5orf34 | 0.430664032 | 2.54594E-18 | 1.52759E-16 |
| ENSG00000070961.16 | ATP2B1  | 0.430604292 | 0           | 0           |
| ENSG00000244462.8  | RBM12   | 0.430576537 | 0           | 0           |
| ENSG00000168259.17 | DNAJC7  | 0.430485953 | 2.63772E-18 | 1.58098E-16 |
| ENSG00000134910.14 | STT3A   | 0.430420553 | 0           | 0           |
| ENSG00000149554.13 | CHEK1   | 0.430394542 | 2.68609E-18 | 1.60826E-16 |
| ENSG00000068654.16 | POLR1A  | 0.430365041 | 0           | 0           |
| ENSG00000213588.6  | ZBTB9   | 0.430359307 | 0           | 0           |
| ENSG00000123143.13 | PKN1    | 0.430303107 | 0           | 0           |
| ENSG00000114503.11 | NCBP2   | 0.430294849 | 0           | 0           |
| ENSG00000275700.5  | AATF    | 0.430255624 | 0           | 0           |
| ENSG00000133398.4  | MED10   | 0.430089088 | 0           | 0           |
| ENSG00000131966.14 | ACTR10  | 0.429992516 | 0           | 0           |
| ENSG00000106305.10 | AIMP2   | 0.429961549 | 0           | 0           |
| ENSG00000131238.18 | PPT1    | 0.429908331 | 0           | 0           |
| ENSG00000113734.18 | BNIP1   | 0.429816347 | 0           | 0           |
| ENSG00000127616.19 | SMARCA4 | 0.42973262  | 0           | 0           |
| ENSG00000153395.10 | LPCAT1  | 0.429715187 | 0           | 0           |
| ENSG00000177150.13 | FAM210A | 0.429684752 | 3.09258E-18 | 1.8477E-16  |
| ENSG00000104356.11 | POP1    | 0.429615846 | 3.13512E-18 | 1.87113E-16 |
| ENSG00000157593.19 | SLC35B2 | 0.429593153 | 0           | 0           |
| ENSG00000163902.12 | RPN1    | 0.429544064 | 0           | 0           |
| ENSG00000163933.10 | RFT1    | 0.429502225 | 3.20653E-18 | 1.91172E-16 |
| ENSG00000177981.11 | ASB8    | 0.429283275 | 3.34868E-18 | 1.99436E-16 |
| ENSG00000108592.17 | FTSJ3   | 0.429279351 | 0           | 0           |
| ENSG00000145912.9  | NHP2    | 0.429078178 | 0           | 0           |
| ENSG00000157020.18 | SEC13   | 0.428978853 | 0           | 0           |

|                    |          |             |             |             |
|--------------------|----------|-------------|-------------|-------------|
| ENSG00000161980.6  | POLR3K   | 0.42884145  | 0           | 0           |
| ENSG00000106615.10 | RHEB     | 0.428777451 | 0           | 0           |
| ENSG00000144021.3  | CIAO1    | 0.428776304 | 0           | 0           |
| ENSG00000051180.17 | RAD51    | 0.428738365 | 3.72989E-18 | 2.21437E-16 |
| ENSG00000158435.8  | CNOT11   | 0.428703818 | 0           | 0           |
| ENSG00000152684.11 | PELO     | 0.42867861  | 3.77421E-18 | 2.23832E-16 |
| ENSG00000184967.7  | NOC4L    | 0.428639131 | 0           | 0           |
| ENSG00000115234.11 | SNX17    | 0.428579261 | 0           | 0           |
| ENSG00000013306.16 | SLC25A39 | 0.428545999 | 0           | 0           |
| ENSG00000205302.7  | SNX2     | 0.428499892 | 0           | 0           |
| ENSG00000186141.9  | POLR3C   | 0.428456309 | 0           | 0           |
| ENSG00000101421.4  | CHMP4B   | 0.428183567 | 0           | 0           |
| ENSG00000062194.16 | GPBP1    | 0.427903944 | 0           | 0           |
| ENSG00000102384.13 | CENPI    | 0.427805815 | 4.48366E-18 | 2.65626E-16 |
| ENSG00000164051.14 | CCDC51   | 0.427792232 | 0           | 0           |
| ENSG00000125970.12 | RALY     | 0.427607576 | 0           | 0           |
| ENSG00000106462.11 | EZH2     | 0.427538899 | 4.72571E-18 | 2.79672E-16 |
| ENSG00000167770.11 | OTUB1    | 0.427473843 | 0           | 0           |
| ENSG00000101473.17 | ACOT8    | 0.42709673  | 0           | 0           |
| ENSG00000068878.15 | PSME4    | 0.427005204 | 0           | 0           |
| ENSG00000006695.12 | COX10    | 0.427000526 | 5.25366E-18 | 3.10589E-16 |
| ENSG00000088356.6  | PDRG1    | 0.426985248 | 0           | 0           |
| ENSG00000142945.13 | KIF2C    | 0.426921019 | 0           | 0           |
| ENSG00000185480.12 | PARPBP   | 0.42685058  | 5.41075E-18 | 3.19541E-16 |
| ENSG00000020129.16 | NCDN     | 0.426641166 | 0           | 0           |
| ENSG00000105993.15 | DNAJB6   | 0.426586965 | 5.6982E-18  | 3.36164E-16 |
| ENSG00000163382.12 | NAXE     | 0.426528996 | 0           | 0           |
| ENSG00000143889.16 | HNRNPLL  | 0.426428688 | 5.87795E-18 | 3.46405E-16 |
| ENSG00000013275.8  | PSMC4    | 0.426330347 | 0           | 0           |
| ENSG00000161956.13 | SEN3     | 0.426320302 | 6.00424E-18 | 3.53478E-16 |
| ENSG00000146670.10 | CDCA5    | 0.42630672  | 0           | 0           |
| ENSG00000119760.16 | SUPT7L   | 0.426298003 | 0           | 0           |

|                    |            |             |             |             |
|--------------------|------------|-------------|-------------|-------------|
| ENSG00000167986.14 | DDB1       | 0.426269559 | 0           | 0           |
| ENSG00000116221.15 | MRPL37     | 0.426237674 | 0           | 0           |
| ENSG00000174442.12 | ZWILCH     | 0.425898549 | 6.52155E-18 | 3.83131E-16 |
| ENSG00000163608.15 | NEPRO      | 0.42589841  | 0           | 0           |
| ENSG00000110931.19 | CAMKK2     | 0.425602271 | 0           | 0           |
| ENSG00000197006.14 | METTL9     | 0.425585984 | 0           | 0           |
| ENSG00000163798.13 | SLC4A1AP   | 0.425553551 | 6.97709E-18 | 4.09466E-16 |
| ENSG00000131871.15 | SELENOS    | 0.425446058 | 0           | 0           |
| ENSG00000145833.16 | DDX46      | 0.425369672 | 0           | 0           |
| ENSG00000132664.12 | POLR3F     | 0.42534788  | 0           | 0           |
| ENSG00000007202.15 | KIAA0100   | 0.425299021 | 0           | 0           |
| ENSG00000117385.16 | P3H1       | 0.425247409 | 0           | 0           |
| ENSG00000076513.17 | ANKRD13A   | 0.425236857 | 0           | 0           |
| ENSG00000112081.17 | SRSF3      | 0.424925258 | 7.88843E-18 | 4.61986E-16 |
| ENSG00000175130.7  | MARCKSL1   | 0.424899199 | 0           | 0           |
| ENSG00000135829.17 | DHX9       | 0.42489475  | 7.93555E-18 | 4.64262E-16 |
| ENSG00000132676.16 | DAP3       | 0.424466803 | 0           | 0           |
| ENSG00000273841.5  | TAF9       | 0.424413127 | 0           | 0           |
| ENSG00000101337.16 | TM9SF4     | 0.424266548 | 0           | 0           |
| ENSG00000071127.17 | WDR1       | 0.424114464 | 0           | 0           |
| ENSG00000109917.11 | ZPR1       | 0.424100701 | 0           | 0           |
| ENSG00000099956.20 | SMARCB1    | 0.424086938 | 0           | 0           |
| ENSG00000168090.10 | COPS6      | 0.42401858  | 0           | 0           |
| ENSG00000143436.11 | MRPL9      | 0.423533197 | 0           | 0           |
| ENSG00000151923.17 | TIAL1      | 0.42349466  | 0           | 0           |
| ENSG00000101003.10 | GIN51      | 0.423378819 | 0           | 0           |
| ENSG00000010270.14 | STARD3NL   | 0.423359001 | 1.07008E-17 | 6.25393E-16 |
| ENSG00000237190.4  | CDKN2AIPNL | 0.42325495  | 0           | 0           |
| ENSG00000127334.11 | DYRK2      | 0.423118718 | 1.12117E-17 | 6.54572E-16 |
| ENSG00000108561.8  | C1QBP      | 0.423052859 | 0           | 0           |
| ENSG00000168393.13 | DTYMK      | 0.423024874 | 0           | 0           |
| ENSG00000164366.4  | CCDC127    | 0.423013405 | 0           | 0           |

|                    |         |             |             |             |
|--------------------|---------|-------------|-------------|-------------|
| ENSG0000006634.8   | DBF4    | 0.423003312 | 0           | 0           |
| ENSG00000104131.13 | EIF3J   | 0.422985878 | 0           | 0           |
| ENSG00000139354.11 | GAS2L3  | 0.422955648 | 1.1572E-17  | 6.74907E-16 |
| ENSG00000065328.17 | MCM10   | 0.422864146 | 1.17792E-17 | 6.86276E-16 |
| ENSG00000110906.13 | KCTD10  | 0.422704788 | 1.21486E-17 | 7.0707E-16  |
| ENSG00000099901.17 | RANBP1  | 0.422664507 | 0           | 0           |
| ENSG00000198612.11 | COPS8   | 0.422506827 | 1.26235E-17 | 7.33949E-16 |
| ENSG00000147274.14 | RBMX    | 0.422418374 | 0           | 0           |
| ENSG00000109606.13 | DHX15   | 0.4222851   | 0           | 0           |
| ENSG00000140612.14 | SEC11A  | 0.422230735 | 0           | 0           |
| ENSG00000147140.17 | NONO    | 0.422177058 | 0           | 0           |
| ENSG00000140307.11 | GTF2A2  | 0.422138521 | 0           | 0           |
| ENSG00000148297.16 | MED22   | 0.422118794 | 0           | 0           |
| ENSG00000178105.11 | DDX10   | 0.422097002 | 0           | 0           |
| ENSG00000144554.12 | FANCD2  | 0.422065969 | 1.37475E-17 | 7.98477E-16 |
| ENSG00000113758.13 | DBN1    | 0.422002863 | 1.39163E-17 | 8.07444E-16 |
| ENSG00000160211.19 | G6PD    | 0.421902621 | 1.41885E-17 | 8.22392E-16 |
| ENSG00000173692.14 | PSMD1   | 0.421893536 | 0           | 0           |
| ENSG00000111667.14 | USP5    | 0.421885278 | 0           | 0           |
| ENSG00000167815.12 | PRDX2   | 0.421849952 | 0           | 0           |
| ENSG00000159479.17 | MED8    | 0.421796734 | 0           | 0           |
| ENSG00000138107.13 | ACTR1A  | 0.421780906 | 0           | 0           |
| ENSG00000124571.18 | XPO5    | 0.42177219  | 0           | 0           |
| ENSG00000196230.13 | TUBB    | 0.421766914 | 0           | 0           |
| ENSG00000121578.13 | B4GALT4 | 0.421725624 | 0           | 0           |
| ENSG00000125505.17 | MBOAT7  | 0.421560006 | 0           | 0           |
| ENSG00000137522.18 | RNF121  | 0.421539591 | 0           | 0           |
| ENSG00000090889.12 | KIF4A   | 0.421314127 | 1.58956E-17 | 9.19443E-16 |
| ENSG00000144048.10 | DUSP11  | 0.421240838 | 1.61218E-17 | 9.31572E-16 |
| ENSG00000181789.14 | COPG1   | 0.42121042  | 0           | 0           |
| ENSG00000142657.21 | PGD     | 0.421155596 | 0           | 0           |
| ENSG00000183520.12 | UTP11   | 0.421126005 | 0           | 0           |

|                    |          |             |             |             |
|--------------------|----------|-------------|-------------|-------------|
| ENSG00000113761.12 | ZNF346   | 0.421099903 | 1.65658E-17 | 9.56245E-16 |
| ENSG00000025772.8  | TOMM34   | 0.420981721 | 0           | 0           |
| ENSG00000100749.8  | VRK1     | 0.42097071  | 0           | 0           |
| ENSG00000141428.17 | C18orf21 | 0.420870697 | 0           | 0           |
| ENSG00000119335.17 | SET      | 0.420717925 | 0           | 0           |
| ENSG00000183684.8  | ALYREF   | 0.420468581 | 0           | 0           |
| ENSG00000114744.9  | COMMD2   | 0.420463993 | 0           | 0           |
| ENSG00000139343.10 | SNRPF    | 0.420456424 | 0           | 0           |
| ENSG00000165280.17 | VCP      | 0.420246534 | 0           | 0           |
| ENSG00000115750.17 | TAF1B    | 0.420203457 | 1.96848E-17 | 1.13512E-15 |
| ENSG00000107929.15 | LARP4B   | 0.420107755 | 0           | 0           |
| ENSG00000186815.13 | TPCN1    | 0.420018752 | 0           | 0           |
| ENSG00000114346.14 | ECT2     | 0.420018318 | 2.03974E-17 | 1.17501E-15 |
| ENSG00000139651.11 | ZNF740   | 0.419975628 | 0           | 0           |
| ENSG00000169118.18 | CSNK1G1  | 0.419935901 | 2.07228E-17 | 1.19253E-15 |
| ENSG00000162627.17 | SNX7     | 0.41983756  | 2.11177E-17 | 1.21402E-15 |
| ENSG00000086589.12 | RBM22    | 0.419795788 | 0           | 0           |
| ENSG00000134779.15 | TPGS2    | 0.419763354 | 2.14205E-17 | 1.23017E-15 |
| ENSG00000136279.21 | DBNL     | 0.41967903  | 0           | 0           |
| ENSG00000119185.13 | ITGB1BP1 | 0.419591222 | 2.21396E-17 | 1.27017E-15 |
| ENSG00000125779.22 | PANK2    | 0.419572618 | 2.22187E-17 | 1.27341E-15 |
| ENSG00000274070.2  | CASTOR2  | 0.419533139 | 0           | 0           |
| ENSG00000159259.8  | CHAF1B   | 0.419490521 | 2.25711E-17 | 1.29195E-15 |
| ENSG00000138375.13 | SMARCAL1 | 0.419486622 | 2.2588E-17  | 1.29195E-15 |
| ENSG00000159202.18 | UBE2Z    | 0.419405141 | 0           | 0           |
| ENSG00000111364.16 | DDX55    | 0.419363302 | 2.31282E-17 | 1.3215E-15  |
| ENSG00000072756.17 | TRNT1    | 0.41911359  | 0           | 0           |
| ENSG00000048991.16 | R3HDM1   | 0.418959441 | 0           | 0           |
| ENSG00000163719.20 | MTMR14   | 0.418846124 | 0           | 0           |
| ENSG00000064490.14 | RFXANK   | 0.418675713 | 2.63812E-17 | 1.50584E-15 |
| ENSG00000102393.14 | GLA      | 0.418533378 | 2.71087E-17 | 1.5458E-15  |
| ENSG00000168496.4  | FEN1     | 0.418291695 | 0           | 0           |

|                    |         |             |             |             |
|--------------------|---------|-------------|-------------|-------------|
| ENSG00000177370.5  | TIMM22  | 0.418167826 | 0           | 0           |
| ENSG00000112877.8  | CEP72   | 0.418124013 | 0           | 0           |
| ENSG00000169217.9  | CD2BP2  | 0.418112543 | 0           | 0           |
| ENSG00000113387.12 | SUB1    | 0.418100844 | 0           | 0           |
| ENSG00000108424.11 | KPNB1   | 0.418056802 | 0           | 0           |
| ENSG00000105063.19 | PPP6R1  | 0.417995097 | 0           | 0           |
| ENSG00000115758.13 | ODC1    | 0.417755158 | 0           | 0           |
| ENSG00000131473.17 | ACLY    | 0.417742541 | 0           | 0           |
| ENSG00000120948.18 | TARDBP  | 0.417690012 | 0           | 0           |
| ENSG00000105220.17 | GPI     | 0.417689782 | 0           | 0           |
| ENSG00000116478.12 | HDAC1   | 0.417612937 | 0           | 0           |
| ENSG00000087269.16 | NOP14   | 0.417608718 | 3.23388E-17 | 1.8403E-15  |
| ENSG00000108953.17 | YWHAE   | 0.417498244 | 0           | 0           |
| ENSG00000101224.17 | CDC25B  | 0.417491821 | 0           | 0           |
| ENSG00000000419.13 | DPM1    | 0.417487692 | 0           | 0           |
| ENSG00000183763.9  | TRAIP   | 0.417449155 | 0           | 0           |
| ENSG00000075914.13 | EXOSC7  | 0.417433695 | 3.34348E-17 | 1.90075E-15 |
| ENSG00000163872.16 | YEATS2  | 0.417358915 | 3.39142E-17 | 1.92606E-15 |
| ENSG00000104341.17 | LAPTM4B | 0.417332397 | 0           | 0           |
| ENSG00000198055.11 | GRK6    | 0.417272297 | 0           | 0           |
| ENSG00000124422.12 | USP22   | 0.417232613 | 0           | 0           |
| ENSG00000125835.19 | SNRPB   | 0.417032358 | 0           | 0           |
| ENSG00000159593.15 | NAE1    | 0.417019742 | 0           | 0           |
| ENSG00000166130.15 | IKBIP   | 0.416989716 | 3.63815E-17 | 2.0641E-15  |
| ENSG00000172795.17 | DCP2    | 0.416954596 | 0           | 0           |
| ENSG00000197965.12 | MPZL1   | 0.416791272 | 0           | 0           |
| ENSG00000152464.15 | RPP38   | 0.416691397 | 3.85032E-17 | 2.18228E-15 |
| ENSG00000130560.9  | UBAC1   | 0.416620608 | 0           | 0           |
| ENSG00000188807.13 | TMEM201 | 0.416375302 | 4.0884E-17  | 2.31488E-15 |
| ENSG00000137807.16 | KIF23   | 0.416226362 | 4.20554E-17 | 2.37881E-15 |
| ENSG00000107341.5  | UBE2R2  | 0.416219868 | 0           | 0           |
| ENSG00000063046.18 | EIF4B   | 0.416198076 | 0           | 0           |

|                    |          |             |             |             |
|--------------------|----------|-------------|-------------|-------------|
| ENSG00000079332.15 | SAR1A    | 0.416173073 | 0           | 0           |
| ENSG00000197102.12 | DYNC1H1  | 0.416139582 | 0           | 0           |
| ENSG00000125877.13 | ITPA     | 0.41609921  | 0           | 0           |
| ENSG00000185627.18 | PSMD13   | 0.416086594 | 0           | 0           |
| ENSG00000156502.14 | SUPV3L1  | 0.415962495 | 0           | 0           |
| ENSG00000063244.13 | U2AF2    | 0.415929463 | 0           | 0           |
| ENSG00000149658.18 | YTHDF1   | 0.415838167 | 0           | 0           |
| ENSG00000169188.5  | APEX2    | 0.415830827 | 0           | 0           |
| ENSG00000107625.13 | DDX50    | 0.415791831 | 0           | 0           |
| ENSG00000181191.12 | PJA1     | 0.41578839  | 0           | 0           |
| ENSG00000115652.15 | UXS1     | 0.415766598 | 0           | 0           |
| ENSG00000139405.16 | RITA1    | 0.415544551 | 0           | 0           |
| ENSG00000121621.7  | KIF18A   | 0.415405772 | 0           | 0           |
| ENSG00000116786.13 | PLEKHM2  | 0.415311723 | 0           | 0           |
| ENSG00000072274.13 | TFRC     | 0.415295666 | 0           | 0           |
| ENSG00000006625.18 | GGCT     | 0.415230061 | 0           | 0           |
| ENSG00000196305.18 | IARS1    | 0.415177302 | 0           | 0           |
| ENSG00000112130.17 | RNF8     | 0.415169503 | 0           | 0           |
| ENSG00000167272.11 | POP5     | 0.415106651 | 0           | 0           |
| ENSG00000087470.18 | DNM1L    | 0.415031871 | 0           | 0           |
| ENSG00000142039.4  | CCDC97   | 0.415000674 | 0           | 0           |
| ENSG00000136527.18 | TRA2B    | 0.414991981 | 5.31205E-17 | 2.99867E-15 |
| ENSG00000122958.15 | VPS26A   | 0.41496207  | 5.34213E-17 | 3.01263E-15 |
| ENSG00000106638.17 | TBL2     | 0.414827257 | 0           | 0           |
| ENSG00000085231.14 | AK6      | 0.414723574 | 0           | 0           |
| ENSG00000163932.15 | PRKCD    | 0.414610051 | 5.70905E-17 | 3.21311E-15 |
| ENSG00000162604.12 | TM2D1    | 0.414547863 | 0           | 0           |
| ENSG00000065060.17 | UHRF1BP1 | 0.414478521 | 5.85241E-17 | 3.28722E-15 |
| ENSG00000197694.18 | SPTAN1   | 0.414187266 | 0           | 0           |
| ENSG00000149636.16 | DSN1     | 0.414065003 | 0           | 0           |
| ENSG00000118655.7  | DCLRE1B  | 0.414064314 | 0           | 0           |
| ENSG00000107175.12 | CREB3    | 0.414042293 | 0           | 0           |

|                    |           |             |             |             |
|--------------------|-----------|-------------|-------------|-------------|
| ENSG00000076003.5  | MCM6      | 0.413787215 | 0           | 0           |
| ENSG00000076248.11 | UNG       | 0.413756018 | 0           | 0           |
| ENSG00000178028.14 | DMAP1     | 0.41372161  | 0           | 0           |
| ENSG00000113716.13 | HMGXB3    | 0.413669309 | 0           | 0           |
| ENSG00000198792.13 | TMEM184B  | 0.413645018 | 6.84664E-17 | 3.83037E-15 |
| ENSG00000070950.10 | RAD18     | 0.413637334 | 6.85654E-17 | 3.8321E-15  |
| ENSG00000101158.15 | NELFCD    | 0.413599346 | 0           | 0           |
| ENSG00000160410.15 | SHKBP1    | 0.41352069  | 7.00851E-17 | 3.91315E-15 |
| ENSG00000117399.14 | CDC20     | 0.413446574 | 0           | 0           |
| ENSG00000111845.5  | PAK1IP1   | 0.413404596 | 0           | 0           |
| ENSG00000115163.15 | CENPA     | 0.413322155 | 7.27482E-17 | 4.05721E-15 |
| ENSG00000111785.21 | RIC8B     | 0.413317682 | 7.28093E-17 | 4.05721E-15 |
| ENSG00000167513.9  | CDT1      | 0.413272699 | 0           | 0           |
| ENSG00000111602.12 | TIMELESS  | 0.413247925 | 0           | 0           |
| ENSG00000214160.10 | ALG3      | 0.413194477 | 0           | 0           |
| ENSG00000184661.14 | CDCA2     | 0.413141216 | 7.52617E-17 | 4.18557E-15 |
| ENSG00000259956.2  | RBM15B    | 0.413005371 | 7.72046E-17 | 4.28939E-15 |
| ENSG00000179933.6  | C14orf119 | 0.412841909 | 0           | 0           |
| ENSG00000141551.14 | CSNK1D    | 0.412775984 | 8.05978E-17 | 4.4735E-15  |
| ENSG00000137269.15 | LRRC1     | 0.412754283 | 0           | 0           |
| ENSG00000159363.19 | ATP13A2   | 0.412562056 | 0           | 0           |
| ENSG00000068489.13 | PRR11     | 0.412528728 | 8.44195E-17 | 4.67179E-15 |
| ENSG00000073111.14 | MCM2      | 0.412470302 | 0           | 0           |
| ENSG00000164109.14 | MAD2L1    | 0.412413896 | 8.62543E-17 | 4.76865E-15 |
| ENSG00000175581.14 | MRPL48    | 0.41239231  | 0           | 0           |
| ENSG00000117481.10 | NSUN4     | 0.412390016 | 0           | 0           |
| ENSG00000225921.7  | NOL7      | 0.412264082 | 0           | 0           |
| ENSG00000152253.9  | SPC25     | 0.412202836 | 0           | 0           |
| ENSG00000135124.15 | P2RX4     | 0.412088601 | 0           | 0           |
| ENSG00000130826.18 | DKC1      | 0.412031713 | 0           | 0           |
| ENSG00000183474.16 | GTF2H2C   | 0.411985906 | 9.34446E-17 | 5.16109E-15 |
| ENSG00000137168.8  | PPIL1     | 0.411791315 | 0           | 0           |

|                    |          |             |             |             |
|--------------------|----------|-------------|-------------|-------------|
| ENSG00000214193.11 | SH3D21   | 0.411781569 | 9.70819E-17 | 5.35673E-15 |
| ENSG00000116161.18 | CACYBP   | 0.411697495 | 0           | 0           |
| ENSG00000163444.12 | TMEM183A | 0.411602758 | 0           | 0           |
| ENSG00000101161.8  | PRPF6    | 0.411486    | 0           | 0           |
| ENSG00000140534.14 | TICRR    | 0.411406612 | 1.04122E-16 | 5.73392E-15 |
| ENSG00000104064.18 | GABPB1   | 0.411369242 | 0           | 0           |
| ENSG00000155506.18 | LARP1    | 0.411343551 | 0           | 0           |
| ENSG00000177192.14 | PUS1     | 0.411305931 | 0           | 0           |
| ENSG00000155755.19 | TMEM237  | 0.411256822 | 1.07072E-16 | 5.89063E-15 |
| ENSG00000110768.12 | GTF2H1   | 0.411198716 | 1.08238E-16 | 5.94899E-15 |
| ENSG00000142864.15 | SERBP1   | 0.411160041 | 0           | 0           |
| ENSG00000111725.11 | PRKAB1   | 0.411125886 | 1.09718E-16 | 6.02443E-15 |
| ENSG00000117408.11 | IPO13    | 0.411088701 | 0           | 0           |
| ENSG00000182004.13 | SNRPE    | 0.411020803 | 0           | 0           |
| ENSG00000086200.17 | IPO11    | 0.410958409 | 0           | 0           |
| ENSG00000215021.10 | PHB2     | 0.410905879 | 0           | 0           |
| ENSG00000037897.17 | METTL1   | 0.41082103  | 1.1613E-16  | 6.36409E-15 |
| ENSG00000132463.14 | GRSF1    | 0.410801049 | 0           | 0           |
| ENSG00000253729.8  | PRKDC    | 0.410744161 | 0           | 0           |
| ENSG00000108829.10 | LRRC59   | 0.410723517 | 0           | 0           |
| ENSG00000204394.13 | VARS1    | 0.410614328 | 0           | 0           |
| ENSG00000175224.16 | ATG13    | 0.410610429 | 0           | 0           |
| ENSG00000047579.20 | DTNBP1   | 0.410604235 | 0           | 0           |
| ENSG00000130305.17 | NSUN5    | 0.410549182 | 0           | 0           |
| ENSG00000154917.11 | RAB6B    | 0.410537463 | 1.22424E-16 | 6.68947E-15 |
| ENSG00000151176.8  | PLBD2    | 0.410478301 | 0           | 0           |
| ENSG00000180198.16 | RCC1     | 0.410386088 | 0           | 0           |
| ENSG00000118961.15 | LDAH     | 0.41032842  | 1.27277E-16 | 6.94118E-15 |
| ENSG00000126457.22 | PRMT1    | 0.410313372 | 0           | 0           |
| ENSG00000134330.19 | IAH1     | 0.410178974 | 1.30862E-16 | 7.12977E-15 |
| ENSG00000198276.16 | UCKL1    | 0.410071598 | 0           | 0           |
| ENSG00000117899.11 | MESD     | 0.409851844 | 0           | 0           |

|                    |          |             |             |             |
|--------------------|----------|-------------|-------------|-------------|
| ENSG00000101363.12 | MANBAL   | 0.409834411 | 0           | 0           |
| ENSG00000153044.10 | CENPH    | 0.409674207 | 1.43719E-16 | 7.81512E-15 |
| ENSG00000206562.12 | METTL6   | 0.409639387 | 1.4465E-16  | 7.85817E-15 |
| ENSG00000157600.12 | TMEM164  | 0.409611905 | 0           | 0           |
| ENSG00000152348.16 | ATG10    | 0.409560913 | 1.46771E-16 | 7.96568E-15 |
| ENSG00000214114.9  | MYCBP    | 0.409555155 | 1.46928E-16 | 7.96651E-15 |
| ENSG00000181852.18 | RNF41    | 0.409512122 | 0           | 0           |
| ENSG00000163161.14 | ERCC3    | 0.409504781 | 0           | 0           |
| ENSG00000184432.11 | COPB2    | 0.409416697 | 0           | 0           |
| ENSG00000081307.14 | UBA5     | 0.409158177 | 0           | 0           |
| ENSG00000108106.14 | UBE2S    | 0.408984301 | 0           | 0           |
| ENSG00000101457.13 | DNTTIP1  | 0.408979278 | 1.63469E-16 | 8.83783E-15 |
| ENSG00000124444.16 | ZNF576   | 0.408955857 | 0           | 0           |
| ENSG00000121289.18 | CEP89    | 0.408900048 | 1.65883E-16 | 8.95975E-15 |
| ENSG00000134690.11 | CDCA8    | 0.408685686 | 1.72592E-16 | 9.31318E-15 |
| ENSG00000105173.14 | CCNE1    | 0.408626642 | 1.74486E-16 | 9.40637E-15 |
| ENSG00000145216.16 | FIP1L1   | 0.408602418 | 1.75269E-16 | 9.43954E-15 |
| ENSG00000177030.17 | DEAF1    | 0.408589296 | 0           | 0           |
| ENSG00000090263.16 | MRPS33   | 0.408296139 | 0           | 0           |
| ENSG00000119599.17 | DCAF4    | 0.408289648 | 1.85695E-16 | 9.99148E-15 |
| ENSG00000124380.11 | SNRNP27  | 0.408195691 | 1.88944E-16 | 1.01566E-14 |
| ENSG00000100526.20 | CDKN3    | 0.408187433 | 1.89232E-16 | 1.01624E-14 |
| ENSG00000184216.14 | IRAK1    | 0.408068357 | 0           | 0           |
| ENSG00000140455.17 | USP3     | 0.408046566 | 0           | 0           |
| ENSG00000122359.18 | ANXA11   | 0.407998991 | 1.95928E-16 | 1.05119E-14 |
| ENSG00000115947.14 | ORC4     | 0.407862391 | 2.00926E-16 | 1.07596E-14 |
| ENSG00000172757.13 | CFL1     | 0.407785982 | 0           | 0           |
| ENSG00000100364.19 | KIAA0930 | 0.407634815 | 0           | 0           |
| ENSG00000130309.11 | COLGALT1 | 0.40760628  | 2.10638E-16 | 1.12369E-14 |
| ENSG00000081154.12 | PCNP     | 0.407593984 | 0           | 0           |
| ENSG00000082898.18 | XPO1     | 0.407583685 | 2.11516E-16 | 1.1273E-14  |
| ENSG00000082068.9  | WDR70    | 0.407458646 | 0           | 0           |

|                    |            |             |             |             |
|--------------------|------------|-------------|-------------|-------------|
| ENSG00000073050.12 | XRCC1      | 0.407244627 | 0           | 0           |
| ENSG00000088833.17 | NSFL1C     | 0.407197374 | 0           | 0           |
| ENSG00000154845.16 | PPP4R1     | 0.407187189 | 2.27532E-16 | 1.20923E-14 |
| ENSG00000170312.16 | CDK1       | 0.407103325 | 0           | 0           |
| ENSG00000178307.10 | TMEM11     | 0.407097751 | 2.31306E-16 | 1.22697E-14 |
| ENSG00000121766.16 | ZCCHC17    | 0.406915456 | 0           | 0           |
| ENSG00000092853.14 | CLSPN      | 0.406843019 | 2.42395E-16 | 1.28096E-14 |
| ENSG00000157985.19 | AGAP1      | 0.406825101 | 2.43194E-16 | 1.28283E-14 |
| ENSG00000144028.15 | SNRNP200   | 0.406781035 | 0           | 0           |
| ENSG00000179091.5  | CYC1       | 0.406739058 | 0           | 0           |
| ENSG00000284024.4  | AC069544.2 | 0.40671823  | 2.48016E-16 | 1.3063E-14  |
| ENSG00000120438.12 | TCP1       | 0.406645238 | 0           | 0           |
| ENSG00000138629.16 | UBL7       | 0.406569334 | 2.5489E-16  | 1.33945E-14 |
| ENSG00000002834.18 | LASP1      | 0.406537655 | 0           | 0           |
| ENSG00000135930.14 | EIF4E2     | 0.406482144 | 0           | 0           |
| ENSG00000188352.12 | FOCAD      | 0.406432825 | 0           | 0           |
| ENSG00000077514.9  | POLD3      | 0.406319646 | 2.66841E-16 | 1.39833E-14 |
| ENSG00000174574.16 | AKIRIN1    | 0.406315608 | 0           | 0           |
| ENSG00000091140.14 | DLD        | 0.406178893 | 0           | 0           |
| ENSG00000128245.15 | YWHAH      | 0.406084386 | 0           | 0           |
| ENSG00000176095.12 | IP6K1      | 0.406059841 | 0           | 0           |
| ENSG00000125450.11 | NUP85      | 0.405848852 | 2.90888E-16 | 1.5201E-14  |
| ENSG00000010292.13 | NCAPD2     | 0.40581247  | 2.92833E-16 | 1.52884E-14 |
| ENSG00000116871.15 | MAP7D1     | 0.405802033 | 2.93393E-16 | 1.52893E-14 |
| ENSG00000102316.17 | MAGED2     | 0.405657725 | 0           | 0           |
| ENSG00000205352.11 | PRR13      | 0.405590744 | 0           | 0           |
| ENSG00000155115.7  | GTF3C6     | 0.40555473  | 0           | 0           |
| ENSG00000137073.23 | UBAP2      | 0.405480409 | 0           | 0           |
| ENSG00000039123.16 | MTREX      | 0.405460452 | 0           | 0           |
| ENSG00000278053.5  | DDX52      | 0.405449442 | 0           | 0           |
| ENSG00000163535.18 | SGO2       | 0.40529277  | 0           | 0           |
| ENSG00000182944.18 | EWSR1      | 0.405264464 | 3.23713E-16 | 1.68382E-14 |

|                    |          |             |             |             |
|--------------------|----------|-------------|-------------|-------------|
| ENSG00000105058.12 | FAM32A   | 0.405169842 | 3.29359E-16 | 1.7116E-14  |
| ENSG00000123545.6  | NDUF4F4  | 0.40512784  | 0           | 0           |
| ENSG00000087206.17 | UIMC1    | 0.40510676  | 3.33177E-16 | 1.72985E-14 |
| ENSG00000108651.10 | UTP6     | 0.404980115 | 0           | 0           |
| ENSG00000141424.13 | SLC39A6  | 0.404876914 | 3.47459E-16 | 1.80233E-14 |
| ENSG00000065802.12 | ASB1     | 0.40482115  | 0           | 0           |
| ENSG00000119878.6  | CRIP1    | 0.404764491 | 0           | 0           |
| ENSG00000149091.15 | DGKZ     | 0.404694069 | 0           | 0           |
| ENSG00000118707.11 | TGIF2    | 0.40461516  | 0           | 0           |
| ENSG00000172336.5  | POP7     | 0.404590156 | 0           | 0           |
| ENSG00000109805.10 | NCAPG    | 0.404491979 | 0           | 0           |
| ENSG00000130638.17 | ATXN10   | 0.404441513 | 0           | 0           |
| ENSG00000168028.14 | RPSA     | 0.404339436 | 0           | 0           |
| ENSG00000112473.18 | SLC39A7  | 0.404333472 | 0           | 0           |
| ENSG00000135677.11 | GNS      | 0.404270161 | 0           | 0           |
| ENSG00000177479.20 | ARIH2    | 0.404238276 | 0           | 0           |
| ENSG00000120727.13 | PAIP2    | 0.40417703  | 0           | 0           |
| ENSG00000124532.15 | MRS2     | 0.404147209 | 0           | 0           |
| ENSG00000101247.18 | NDUF4F5  | 0.404092043 | 4.00906E-16 | 2.07003E-14 |
| ENSG00000135486.19 | HNRNP1A1 | 0.403973792 | 0           | 0           |
| ENSG00000087077.14 | TRIP6    | 0.403939614 | 0           | 0           |
| ENSG00000105176.18 | URI1     | 0.403848088 | 0           | 0           |
| ENSG00000116560.11 | SFPQ     | 0.403830655 | 0           | 0           |
| ENSG00000065135.12 | GNAI3    | 0.403772758 | 4.24887E-16 | 2.18784E-14 |
| ENSG00000115091.12 | ACTR3    | 0.403754039 | 0           | 0           |
| ENSG00000145979.18 | TBC1D7   | 0.403722613 | 0           | 0           |
| ENSG00000143106.13 | PSMA5    | 0.403715502 | 0           | 0           |
| ENSG00000174371.17 | EXO1     | 0.403653476 | 4.34203E-16 | 2.23029E-14 |
| ENSG00000163811.12 | WDR43    | 0.403651985 | 4.34321E-16 | 2.23029E-14 |
| ENSG00000103512.15 | NOMO1    | 0.403643039 | 4.35027E-16 | 2.23189E-14 |
| ENSG00000113013.16 | HSPA9    | 0.403639804 | 0           | 0           |
| ENSG00000174173.7  | TRMT10C  | 0.403484762 | 4.47722E-16 | 2.29492E-14 |

|                    |          |             |             |             |
|--------------------|----------|-------------|-------------|-------------|
| ENSG00000101132.10 | PFDN4    | 0.403351694 | 0           | 0           |
| ENSG00000117593.12 | DARS2    | 0.40333426  | 0           | 0           |
| ENSG00000074266.22 | EED      | 0.403264046 | 4.66034E-16 | 2.38661E-14 |
| ENSG00000164332.8  | UBLCP1   | 0.403203968 | 0           | 0           |
| ENSG00000167792.13 | NDUFV1   | 0.403180112 | 0           | 0           |
| ENSG00000006712.15 | PAF1     | 0.403119233 | 4.78446E-16 | 2.44551E-14 |
| ENSG00000115561.16 | CHMP3    | 0.403109713 | 4.79274E-16 | 2.44551E-14 |
| ENSG00000083845.9  | RPS5     | 0.403079411 | 0           | 0           |
| ENSG00000130921.8  | C12orf65 | 0.402992038 | 4.89615E-16 | 2.49602E-14 |
| ENSG00000134440.12 | NARS1    | 0.402974581 | 0           | 0           |
| ENSG00000022277.13 | RTF2     | 0.402859429 | 0           | 0           |
| ENSG00000134452.20 | FBH1     | 0.402796576 | 0           | 0           |
| ENSG00000196235.14 | SUPT5H   | 0.402792906 | 0           | 0           |
| ENSG00000123473.16 | STIL     | 0.402787746 | 5.08092E-16 | 2.58787E-14 |
| ENSG00000063978.16 | RNF4     | 0.402738312 | 0           | 0           |
| ENSG00000114738.11 | MAPKAPK3 | 0.402685324 | 0           | 0           |
| ENSG00000047849.21 | MAP4     | 0.402594027 | 0           | 0           |
| ENSG00000125885.13 | MCM8     | 0.402582696 | 5.27325E-16 | 2.68097E-14 |
| ENSG00000136238.18 | RAC1     | 0.402561225 | 0           | 0           |
| ENSG00000148925.11 | BTBD10   | 0.402518329 | 0           | 0           |
| ENSG00000132964.12 | CDK8     | 0.402405012 | 0           | 0           |
| ENSG00000148950.11 | IMMP1L   | 0.402402718 | 0           | 0           |
| ENSG00000155959.12 | VBP1     | 0.402141354 | 5.71178E-16 | 2.89869E-14 |
| ENSG00000132591.12 | ERAL1    | 0.402135023 | 0           | 0           |
| ENSG00000162063.13 | CCNF     | 0.402120503 | 5.73336E-16 | 2.90702E-14 |
| ENSG00000167881.15 | SRP68    | 0.40200129  | 0           | 0           |
| ENSG00000168958.20 | MFF      | 0.401954037 | 0           | 0           |
| ENSG00000106477.20 | CEP41    | 0.401896001 | 0           | 0           |
| ENSG00000167965.18 | MLST8    | 0.401812275 | 0           | 0           |
| ENSG00000089685.15 | BIRC5    | 0.401755984 | 6.12382E-16 | 3.1022E-14  |
| ENSG00000132773.12 | TOE1     | 0.401636243 | 6.25768E-16 | 3.16716E-14 |
| ENSG00000120333.4  | MRPS14   | 0.401623994 | 6.27154E-16 | 3.17132E-14 |

|                    |          |             |             |             |
|--------------------|----------|-------------|-------------|-------------|
| ENSG00000117632.23 | STMN1    | 0.401475534 | 0           | 0           |
| ENSG00000116954.8  | RRAGC    | 0.401452779 | 6.46838E-16 | 3.25623E-14 |
| ENSG00000164924.18 | YWHAZ    | 0.401392955 | 0           | 0           |
| ENSG00000197021.9  | EOLA2    | 0.401232613 | 0           | 0           |
| ENSG00000137656.12 | BUD13    | 0.40114407  | 0           | 0           |
| ENSG00000277443.3  | MARCKS   | 0.401143611 | 0           | 0           |
| ENSG00000090266.13 | NDUFB2   | 0.400919041 | 0           | 0           |
| ENSG00000184575.12 | XPOT     | 0.400847242 | 0           | 0           |
| ENSG00000204392.11 | LSM2     | 0.400793566 | 0           | 0           |
| ENSG00000166197.17 | NOLC1    | 0.400735072 | 0           | 0           |
| ENSG00000156026.14 | MCU      | 0.400723373 | 0           | 0           |
| ENSG00000233954.6  | UQCRHL   | 0.400681671 | 7.4327E-16  | 3.72834E-14 |
| ENSG00000184983.11 | NDUFA6   | 0.400679101 | 0           | 0           |
| ENSG00000112039.5  | FANCE    | 0.400670431 | 7.44775E-16 | 3.73256E-14 |
| ENSG00000100412.17 | ACO2     | 0.400647446 | 0           | 0           |
| ENSG00000178999.13 | AURKB    | 0.400601798 | 0           | 0           |
| ENSG00000139370.12 | SLC15A4  | 0.40057863  | 0           | 0           |
| ENSG00000116514.17 | RNF19B   | 0.400576565 | 0           | 0           |
| ENSG00000134717.18 | BTF3L4   | 0.400410489 | 0           | 0           |
| ENSG00000146729.10 | NIPSNAP2 | 0.400322633 | 2.83577E-18 | 1.69607E-16 |
| ENSG00000020256.20 | ZFP64    | 0.400249711 | 8.03314E-16 | 4.00454E-14 |
| ENSG00000161217.12 | PCYT1A   | 0.400207756 | 8.09393E-16 | 4.03128E-14 |
| ENSG00000014216.16 | CAPN1    | 0.400202664 | 1.45551E-17 | 8.42772E-16 |

---
